# Supplementary material for: A Nomogram Based on a Three‐Gene Signature Derived from AATF Coexpressed Genes Predicts Overall Survival of Hepatocellular Carcinoma Patients
Source: Hindawi journal article supplement (doi:10.1155/2020/7310768), 2020-01-01
Supplement: f1 [file 7310768.f1.pdf]

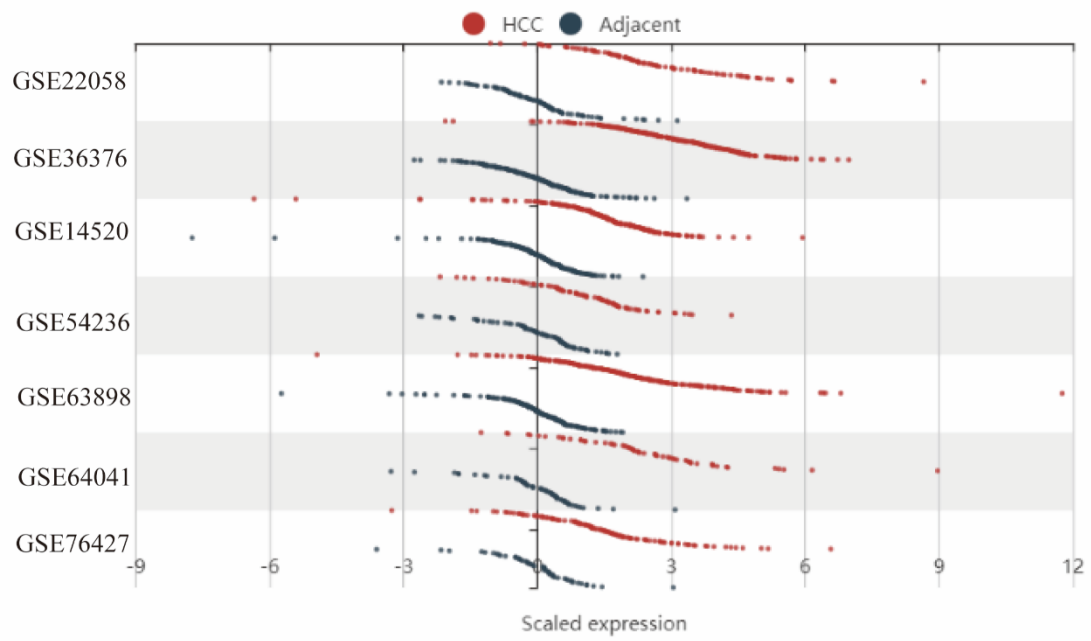

**Figure S1. Comparison of AATF expression between HCC and ANTTs in seven GEO series. ANTTs: adjacent non-tumor tissues.**

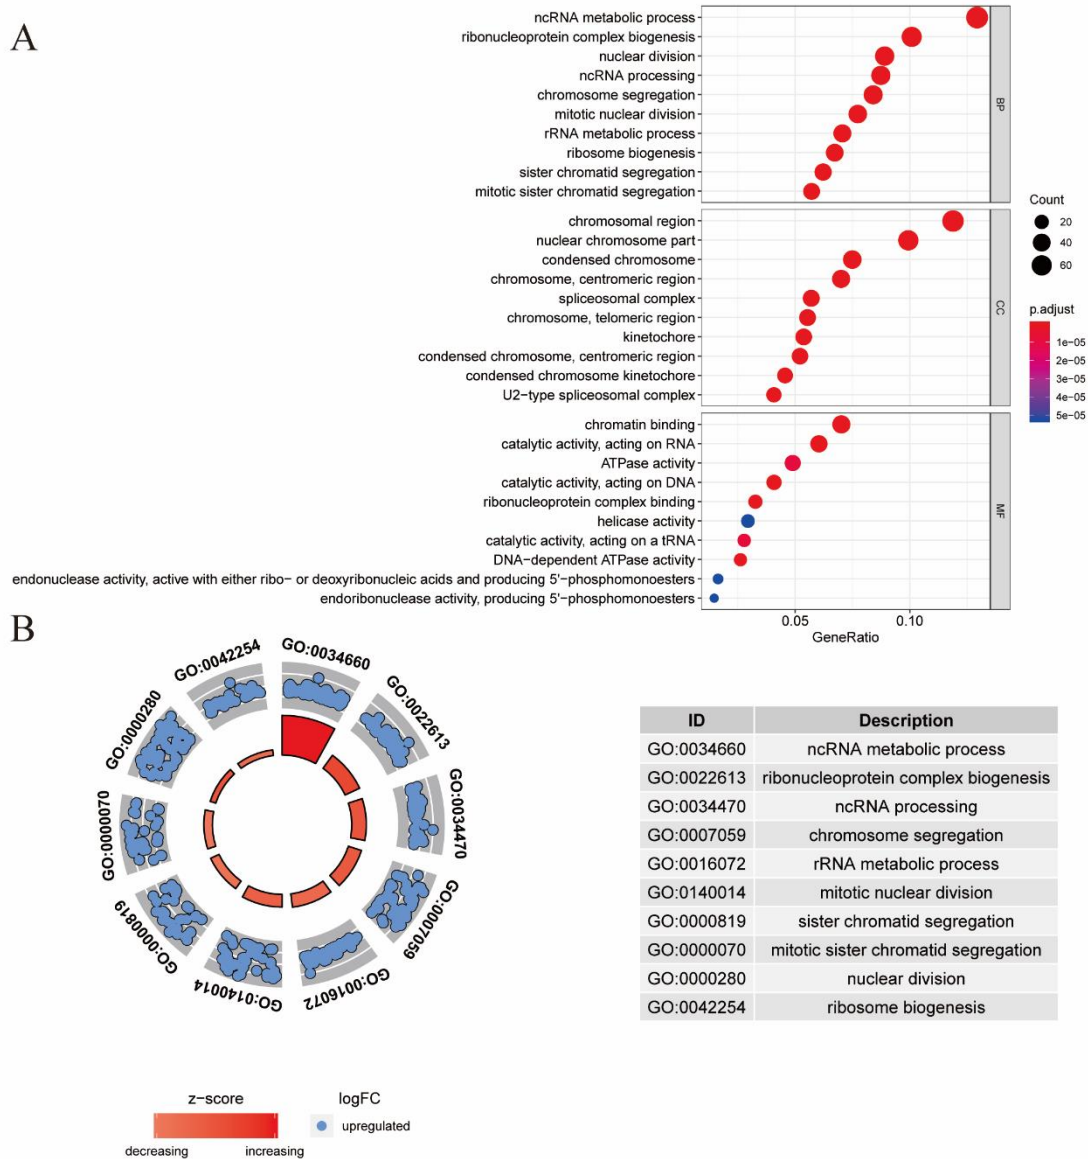

**Figure S2. GO enrichment analysis of co-expressed genes with AATF.** GO analysis revealed the most significant biological process, molecular function and cell cellular in HCC.

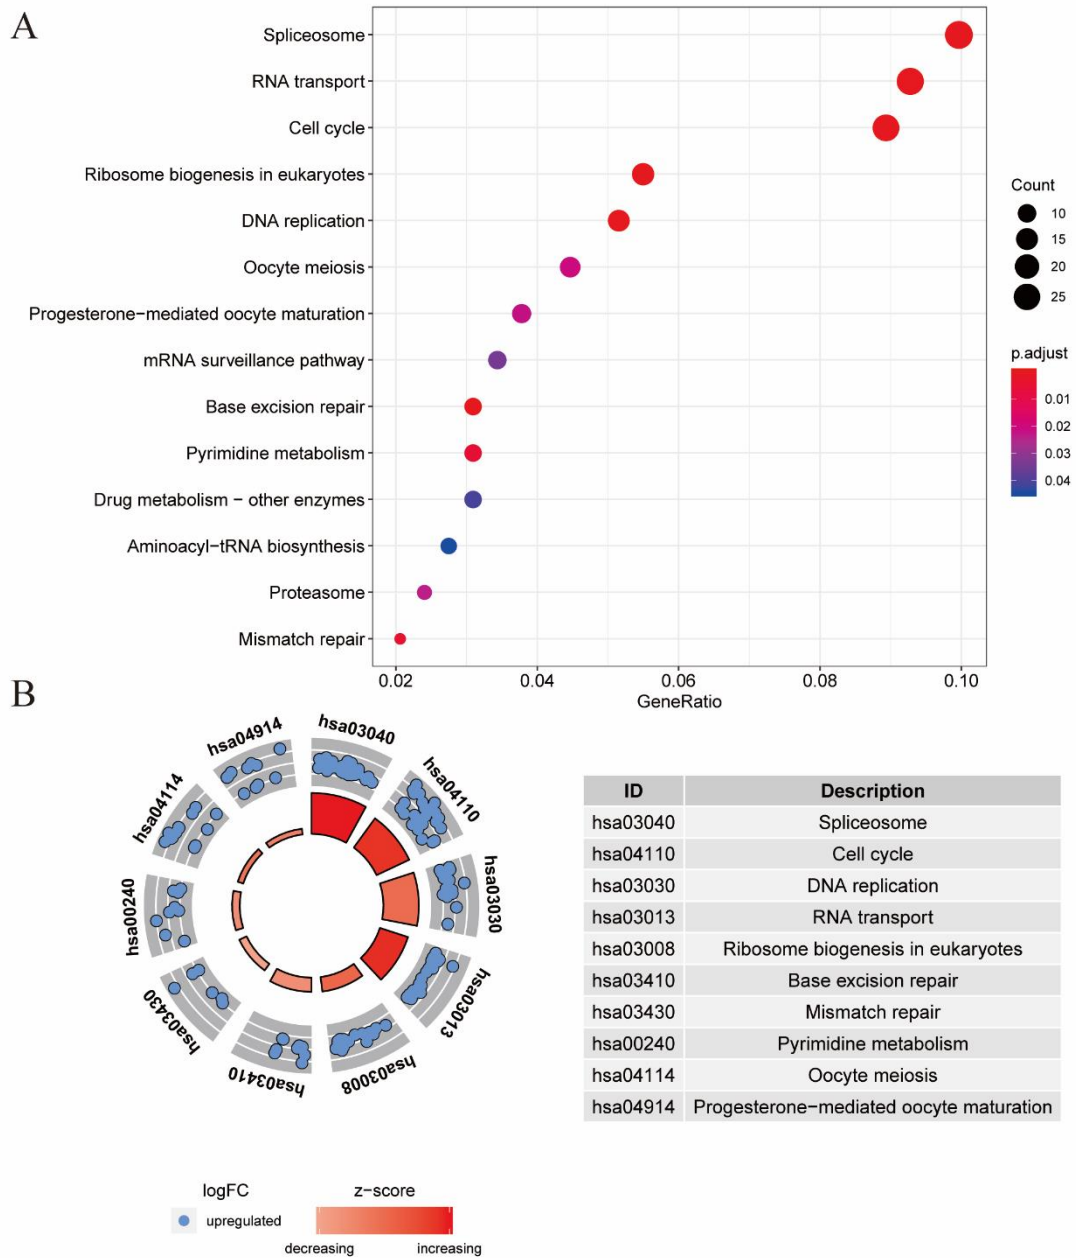

**Figure S3. KEGG analysis of co-expressed genes with AATF.** KEGG analysis revealed the most important pathways in HCC.

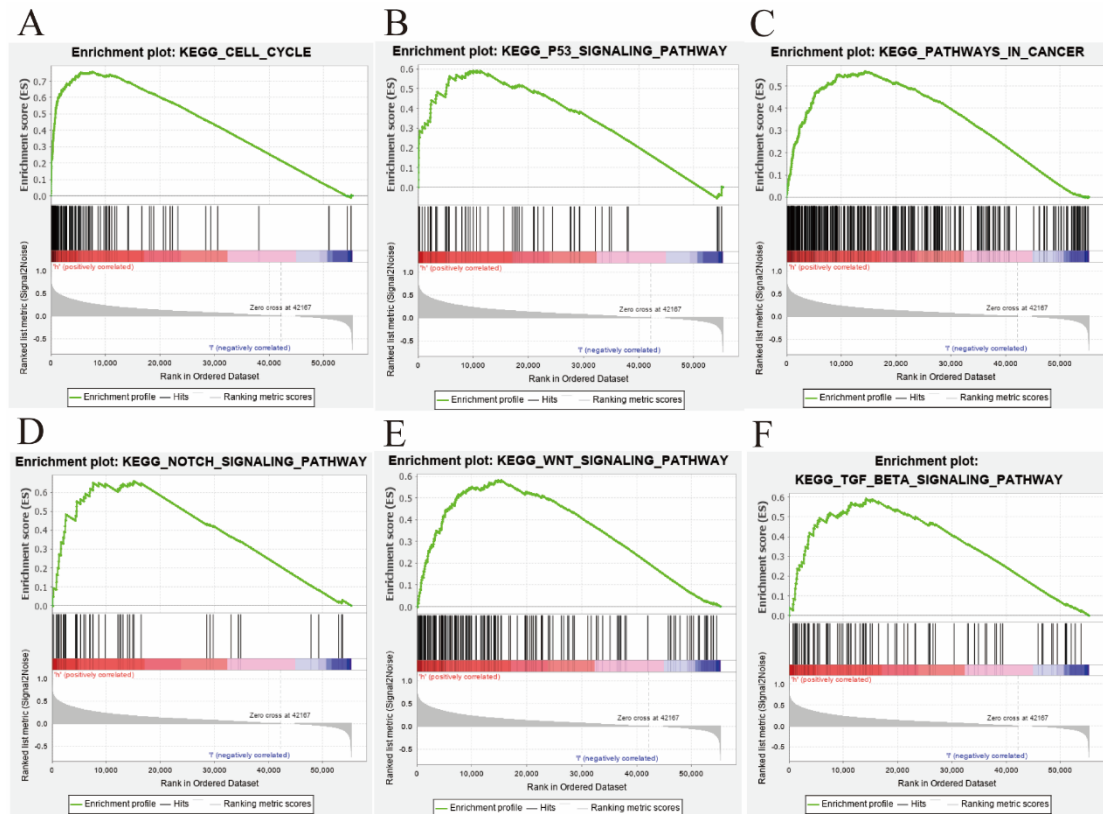

**Figure S4. GSEA shows upregulation of signaling response genes in HCC.** NES, normalized enrichment score. Values are row-scaled to show relative expression. Blue and red are low and high levels, respectively.

**Table S1 Expression analysis of KIF20A in GEO**

| Dataset  | P-value  | Type     | Num | Mean    | STD     | IQR    |
|----------|----------|----------|-----|---------|---------|--------|
| GSE22058 | 1.63E-55 | HCC      | 100 | 8.772   | 1.14    | 1.582  |
|          |          | Adjacent | 97  | 5.497   | 0.8598  | 1.266  |
| GSE25097 | 1.05E-50 | HCC      | 268 | 1.026   | 0.8076  | 0.9293 |
|          |          | Adjacent | 243 | 0.09964 | 0.08843 | 0.067  |
| GSE36376 | 2.48E-66 | HCC      | 240 | 7.295   | 0.5396  | 0.7995 |
|          |          | Adjacent | 193 | 6.46    | 0.1381  | 0.2076 |
| GSE14520 | 1.18E-67 | HCC      | 225 | 5.198   | 1.021   | 1.627  |
|          |          | Adjacent | 220 | 3.501   | 0.2568  | 0.2612 |
| GSE46444 | 0.02358  | HCC      | 88  | 6.747   | 1.196   | 1.751  |
|          |          | Adjacent | 48  | 7.42    | 1.81    | 2.79   |
| GSE54236 | 4.32E-17 | HCC      | 81  | 6.363   | 1.466   | 1.915  |
|          |          | Adjacent | 80  | 4.492   | 0.9458  | 1.026  |
| GSE63898 | 3.05E-52 | HCC      | 228 | 5.572   | 0.9925  | 1.327  |
|          |          | Adjacent | 168 | 4.255   | 0.2321  | 0.253  |
| GSE64041 | 2.06E-13 | HCC      | 60  | 6.098   | 1.056   | 1.416  |
|          |          | Adjacent | 60  | 4.795   | 0.4261  | 0.3502 |
| GSE64041 | 2.55E-29 | HCC      | 115 | 8.163   | 0.702   | 0.99   |
|          |          | Adjacent | 52  | 7.071   | 0.3201  | 0.305  |

**Table S2 Expression analysis of UCK2 in GEO**

| Dataset  | P-value  | Type     | Num | Mean  | STD    | IQR    |
|----------|----------|----------|-----|-------|--------|--------|
| GSE22058 | 4.80E-14 | HCC      | 100 | 8.402 | 0.6534 | 0.839  |
|          |          | Adjacent | 97  | 7.774 | 0.3814 | 0.4813 |
| GSE25097 | 4.17E-34 | HCC      | 268 | 2.216 | 1.215  | 1.486  |
|          |          | Adjacent | 243 | 1.131 | 0.4475 | 0.5868 |
| GSE36376 | 1.14E-70 | HCC      | 240 | 7.284 | 0.6465 | 0.9894 |
|          |          | Adjacent | 193 | 6.231 | 0.2423 | 0.3289 |
| GSE14520 | 5.09E-73 | HCC      | 225 | 5.536 | 0.8175 | 1.171  |
|          |          | Adjacent | 220 | 4.097 | 0.3763 | 0.3883 |
| GSE10143 | 5.76E-05 | HCC      | 80  | 12.53 | 1.041  | 1.153  |
|          |          | Adjacent | 82  | 11.86 | 1.025  | 1.18   |
| GSE46444 | 0.009643 | HCC      | 88  | 7.556 | 1.417  | 2.627  |
|          |          | Adjacent | 48  | 6.891 | 1.397  | 2.592  |
| GSE54236 | 2.96E-14 | HCC      | 81  | 10.1  | 0.8238 | 1.006  |
|          |          | Adjacent | 80  | 9.199 | 0.4522 | 0.4887 |
| GSE63898 | 7.91E-37 | HCC      | 228 | 5.958 | 0.4244 | 0.5974 |
|          |          | Adjacent | 168 | 5.456 | 0.2818 | 0.3907 |
| GSE64041 | 2.57E-13 | HCC      | 60  | 8.672 | 0.507  | 0.527  |
|          |          | Adjacent | 60  | 8.045 | 0.2318 | 0.1702 |
| GSE76427 | 2.56E-15 | HCC      | 115 | 8.334 | 0.4967 | 0.745  |
|          |          | Adjacent | 52  | 7.702 | 0.3795 | 0.375  |

**Table S3 Expression analysis of SLC41A3 in GEO**

| Dataset  | P-value  | Type     | Num | Mean   | STD    | IQR    |
|----------|----------|----------|-----|--------|--------|--------|
| GSE22058 | 1.56E-23 | HCC      | 100 | 9.693  | 0.5147 | 0.6715 |
|          |          | Adjacent | 97  | 8.99   | 0.2932 | 0.3328 |
| GSE25097 | 9.26E-49 | HCC      | 268 | 1.612  | 0.6054 | 0.846  |
|          |          | Adjacent | 243 | 0.9248 | 0.2248 | 0.2615 |
| GSE36376 | 1.16E-89 | HCC      | 240 | 8.563  | 0.505  | 0.6518 |
|          |          | Adjacent | 193 | 7.498  | 0.3437 | 0.3744 |
| GSE14520 | 1.27E-30 | HCC      | 225 | 5.514  | 0.4485 | 0.622  |
|          |          | Adjacent | 220 | 5.067  | 0.2857 | 0.3215 |
| GSE54236 | 7.04E-06 | HCC      | 81  | 11.42  | 0.4316 | 0.574  |
|          |          | Adjacent | 80  | 11.14  | 0.3226 | 0.3162 |
| GSE63898 | 2.84E-41 | HCC      | 228 | 5.997  | 0.4727 | 0.5992 |
|          |          | Adjacent | 168 | 5.42   | 0.2742 | 0.3484 |
| GSE64041 | 5.47E-09 | HCC      | 60  | 8.318  | 0.3457 | 0.4254 |
|          |          | Adjacent | 60  | 7.986  | 0.2043 | 0.2261 |
| GSE76427 | 1.89E-13 | HCC      | 115 | 9.338  | 0.4652 | 0.585  |
|          |          | Adjacent | 52  | 8.783  | 0.3697 | 0.3575 |

**Table 4S Co-expressed genes with AATF (Poisson coefficient>0.6)**

| <b>Gene1</b> | <b>Gene2</b> | <b>Gene2 Type</b> | <b>Coefficient</b> | <b>P-value</b> |
|--------------|--------------|-------------------|--------------------|----------------|
| AATF         | SLC26A6      | protein_coding    | 0.637              | 1.12365E-49    |
| AATF         | CDC37        | protein_coding    | 0.668              | 4.41942E-56    |
| AATF         | CCDC97       | protein_coding    | 0.646              | 2.18095E-51    |
| AATF         | SPSB2        | protein_coding    | 0.659              | 4.61814E-54    |
| AATF         | TIMM9        | protein_coding    | 0.606              | 8.12944E-44    |
| AATF         | C12orf73     | protein_coding    | 0.658              | 5.25521E-54    |
| AATF         | BOD1         | protein_coding    | 0.669              | 3.10064E-56    |
| AATF         | LARS         | protein_coding    | 0.606              | 6.18118E-44    |
| AATF         | EXOSC2       | protein_coding    | 0.616              | 1.17434E-45    |
| AATF         | DDX51        | protein_coding    | 0.66               | 2.67048E-54    |
| AATF         | BUD13        | protein_coding    | 0.645              | 3.66119E-51    |
| AATF         | NPLOC4       | protein_coding    | 0.654              | 4.36179E-53    |
| AATF         | METTL6       | protein_coding    | 0.671              | 7.49432E-57    |
| AATF         | EXOSC3       | protein_coding    | 0.631              | 1.57996E-48    |
| AATF         | PTRH2        | protein_coding    | 0.629              | 4.60673E-48    |
| AATF         | FBXW9        | protein_coding    | 0.603              | 2.68261E-43    |
| AATF         | LIG1         | protein_coding    | 0.614              | 2.30339E-45    |
| AATF         | TROAP        | protein_coding    | 0.615              | 2.15235E-45    |
| AATF         | CDK1         | protein_coding    | 0.622              | 7.80771E-47    |
| AATF         | CPSF3        | protein_coding    | 0.73               | 8.33764E-72    |
| AATF         | JMJD6        | protein_coding    | 0.737              | 1.04223E-73    |
| AATF         | MMS19        | protein_coding    | 0.624              | 4.17594E-47    |
| AATF         | CDC25C       | protein_coding    | 0.61               | 1.65197E-44    |
| AATF         | NHP2         | protein_coding    | 0.715              | 1.58876E-67    |
| AATF         | SMARCE1      | protein_coding    | 0.643              | 7.54352E-51    |
| AATF         | IP6K1        | protein_coding    | 0.646              | 1.95779E-51    |
| AATF         | TTC27        | protein_coding    | 0.757              | 6.28658E-80    |
| AATF         | H2AFZ        | protein_coding    | 0.664              | 3.24191E-55    |
| AATF         | G6PC3        | protein_coding    | 0.631              | 1.63467E-48    |
| AATF         | ADPRHL2      | protein_coding    | 0.607              | 5.15097E-44    |
| AATF         | COPZ1        | protein_coding    | 0.708              | 7.35752E-66    |
| AATF         | COG1         | protein_coding    | 0.666              | 1.1072E-55     |
| AATF         | RSL1D1       | protein_coding    | 0.604              | 1.86792E-43    |
| AATF         | TK1          | protein_coding    | 0.705              | 4.58065E-65    |
| AATF         | TSEN54       | protein_coding    | 0.751              | 3.28303E-78    |
| AATF         | DAXX         | protein_coding    | 0.7                | 8.6573E-64     |
| AATF         | JPT1         | protein_coding    | 0.705              | 5.2008E-65     |
| AATF         | LYRM4        | protein_coding    | 0.635              | 2.85889E-49    |
| AATF         | DUSP28       | protein_coding    | 0.61               | 1.23065E-44    |
| AATF         | METTL23      | protein_coding    | 0.713              | 4.24573E-67    |
| AATF         | VARS         | protein_coding    | 0.653              | 7.91353E-53    |
| AATF         | NSUN5        | protein_coding    | 0.777              | 9.1419E-87     |



|      |          |                |       |             |
|------|----------|----------------|-------|-------------|
| AATF | TONSL    | protein_coding | 0.63  | 2.79725E-48 |
| AATF | DPH2     | protein_coding | 0.665 | 2.24592E-55 |
| AATF | UBE2D2   | protein_coding | 0.666 | 1.31187E-55 |
| AATF | RAD51D   | protein_coding | 0.645 | 2.49679E-51 |
| AATF | CDC45    | protein_coding | 0.659 | 3.931E-54   |
| AATF | LIG3     | protein_coding | 0.694 | 2.90485E-62 |
| AATF | FARSA    | protein_coding | 0.632 | 1.34417E-48 |
| AATF | FAAP24   | protein_coding | 0.683 | 1.74942E-59 |
| AATF | RAD18    | protein_coding | 0.613 | 4.83673E-45 |
| AATF | HAX1     | protein_coding | 0.611 | 1.00505E-44 |
| AATF | TATDN2   | protein_coding | 0.625 | 2.45678E-47 |
| AATF | TEFM     | protein_coding | 0.614 | 2.55262E-45 |
| AATF | DNAAF5   | protein_coding | 0.614 | 2.92229E-45 |
| AATF | HSPBP1   | protein_coding | 0.616 | 1.45274E-45 |
| AATF | DSCC1    | protein_coding | 0.671 | 6.76657E-57 |
| AATF | PHB      | protein_coding | 0.751 | 3.94001E-78 |
| AATF | RBM42    | protein_coding | 0.685 | 5.98842E-60 |
| AATF | RRP1     | protein_coding | 0.662 | 7.50297E-55 |
| AATF | TBCB     | protein_coding | 0.659 | 4.56798E-54 |
| AATF | DKC1     | protein_coding | 0.628 | 6.1316E-48  |
| AATF | EIF6     | protein_coding | 0.618 | 4.88714E-46 |
| AATF | KNOP1    | protein_coding | 0.654 | 4.99991E-53 |
| AATF | TTC1     | protein_coding | 0.62  | 2.40301E-46 |
| AATF | MIF4GD   | protein_coding | 0.604 | 1.58997E-43 |
| AATF | SSRP1    | protein_coding | 0.658 | 7.63159E-54 |
| AATF | TAF9     | protein_coding | 0.625 | 2.47401E-47 |
| AATF | PRPF3    | protein_coding | 0.656 | 1.86054E-53 |
| AATF | DXO      | protein_coding | 0.603 | 2.02321E-43 |
| AATF | THOC5    | protein_coding | 0.648 | 7.98708E-52 |
| AATF | C17orf75 | protein_coding | 0.679 | 1.14622E-58 |
| AATF | RFC4     | protein_coding | 0.697 | 5.55653E-63 |
| AATF | IFT20    | protein_coding | 0.609 | 2.06178E-44 |
| AATF | PSME3    | protein_coding | 0.692 | 1.19422E-61 |
| AATF | RAD51    | protein_coding | 0.662 | 6.56256E-55 |
| AATF | CDC6     | protein_coding | 0.636 | 1.84461E-49 |
| AATF | VPS33B   | protein_coding | 0.675 | 9.86333E-58 |
| AATF | SKA3     | protein_coding | 0.607 | 5.94199E-44 |
| AATF | ZNF335   | protein_coding | 0.61  | 1.20597E-44 |
| AATF | ISG20L2  | protein_coding | 0.621 | 1.62206E-46 |
| AATF | ZPR1     | protein_coding | 0.618 | 6.26263E-46 |
| AATF | GRK6     | protein_coding | 0.716 | 7.91442E-68 |
| AATF | EFNA4    | protein_coding | 0.678 | 1.70296E-58 |
| AATF | TIMM17B  | protein_coding | 0.648 | 7.42034E-52 |
| AATF | INO80E   | protein_coding | 0.633 | 7.95635E-49 |

|      |          |                |       |             |
|------|----------|----------------|-------|-------------|
| AATF | ALKBH4   | protein_coding | 0.613 | 4.12101E-45 |
| AATF | H2AFY    | protein_coding | 0.638 | 9.69321E-50 |
| AATF | CNOT10   | protein_coding | 0.632 | 1.05886E-48 |
| AATF | PDAP1    | protein_coding | 0.689 | 6.76981E-61 |
| AATF | WDCP     | protein_coding | 0.652 | 1.25814E-52 |
| AATF | SUB1     | protein_coding | 0.626 | 1.37502E-47 |
| AATF | BRD9     | protein_coding | 0.636 | 2.133E-49   |
| AATF | TJAP1    | protein_coding | 0.639 | 3.95201E-50 |
| AATF | UBXN1    | protein_coding | 0.63  | 3.22975E-48 |
| AATF | NDRG3    | protein_coding | 0.685 | 6.49786E-60 |
| AATF | PRR11    | protein_coding | 0.629 | 3.73218E-48 |
| AATF | MORN2    | protein_coding | 0.613 | 3.37461E-45 |
| AATF | TRAPPC3  | protein_coding | 0.62  | 2.5921E-46  |
| AATF | CERS5    | protein_coding | 0.681 | 5.15178E-59 |
| AATF | NME2     | protein_coding | 0.623 | 6.91786E-47 |
| AATF | HSPB11   | protein_coding | 0.666 | 1.20119E-55 |
| AATF | EZH2     | protein_coding | 0.636 | 1.91905E-49 |
| AATF | MXD3     | protein_coding | 0.663 | 5.76438E-55 |
| AATF | ZCRB1    | protein_coding | 0.627 | 1.10202E-47 |
| AATF | HAUS8    | protein_coding | 0.615 | 1.48715E-45 |
| AATF | PPIL1    | protein_coding | 0.625 | 2.24418E-47 |
| AATF | FLOT1    | protein_coding | 0.632 | 1.27623E-48 |
| AATF | TEDC2    | protein_coding | 0.641 | 1.69791E-50 |
| AATF | ANAPC11  | protein_coding | 0.606 | 6.74046E-44 |
| AATF | YTHDF1   | protein_coding | 0.615 | 1.93328E-45 |
| AATF | RALA     | protein_coding | 0.625 | 2.54318E-47 |
| AATF | KDM1A    | protein_coding | 0.645 | 2.65497E-51 |
| AATF | GAR1     | protein_coding | 0.617 | 9.26416E-46 |
| AATF | EIF3D    | protein_coding | 0.723 | 8.03946E-70 |
| AATF | EIPR1    | protein_coding | 0.637 | 1.31694E-49 |
| AATF | GRN      | protein_coding | 0.729 | 2.20201E-71 |
| AATF | SEC13    | protein_coding | 0.625 | 2.26938E-47 |
| AATF | SMARCD1  | protein_coding | 0.645 | 3.18854E-51 |
| AATF | WDR70    | protein_coding | 0.728 | 2.6623E-71  |
| AATF | TUBG1    | protein_coding | 0.731 | 3.90982E-72 |
| AATF | ASNA1    | protein_coding | 0.66  | 2.77586E-54 |
| AATF | EIF2B1   | protein_coding | 0.698 | 3.30089E-63 |
| AATF | TBRG4    | protein_coding | 0.64  | 3.59886E-50 |
| AATF | TLK2     | protein_coding | 0.654 | 4.67354E-53 |
| AATF | TRIM28   | protein_coding | 0.674 | 2.2343E-57  |
| AATF | USP21    | protein_coding | 0.606 | 8.59008E-44 |
| AATF | CCDC34   | protein_coding | 0.632 | 1.00113E-48 |
| AATF | C17orf53 | protein_coding | 0.643 | 8.25385E-51 |
| AATF | SNX11    | protein_coding | 0.698 | 2.83938E-63 |

|      |         |                |       |             |
|------|---------|----------------|-------|-------------|
| AATF | ANKS3   | protein_coding | 0.628 | 7.77535E-48 |
| AATF | DBNL    | protein_coding | 0.64  | 3.87433E-50 |
| AATF | NSMCE2  | protein_coding | 0.666 | 1.16284E-55 |
| AATF | DDX42   | protein_coding | 0.609 | 2.36007E-44 |
| AATF | UCKL1   | protein_coding | 0.655 | 3.26501E-53 |
| AATF | GPRIN1  | protein_coding | 0.602 | 4.4641E-43  |
| AATF | SF3B6   | protein_coding | 0.648 | 8.19736E-52 |
| AATF | BZW2    | protein_coding | 0.618 | 5.34231E-46 |
| AATF | AIMP1   | protein_coding | 0.616 | 1.43754E-45 |
| AATF | HMGXB3  | protein_coding | 0.607 | 4.56074E-44 |
| AATF | CSTF2   | protein_coding | 0.667 | 6.00937E-56 |
| AATF | HINFP   | protein_coding | 0.616 | 1.1876E-45  |
| AATF | UBE2C   | protein_coding | 0.641 | 1.8085E-50  |
| AATF | MLST8   | protein_coding | 0.625 | 2.10641E-47 |
| AATF | HMGA1   | protein_coding | 0.72  | 5.591E-69   |
| AATF | SCNM1   | protein_coding | 0.734 | 5.17143E-73 |
| AATF | LCMT1   | protein_coding | 0.696 | 1.09313E-62 |
| AATF | MFSD5   | protein_coding | 0.706 | 2.40554E-65 |
| AATF | ZSWIM9  | protein_coding | 0.642 | 1.18709E-50 |
| AATF | UNC45A  | protein_coding | 0.65  | 2.70468E-52 |
| AATF | PRCC    | protein_coding | 0.688 | 1.11522E-60 |
| AATF | FEN1    | protein_coding | 0.638 | 8.6149E-50  |
| AATF | DHX8    | protein_coding | 0.666 | 1.32643E-55 |
| AATF | CCDC86  | protein_coding | 0.654 | 3.60346E-53 |
| AATF | ELOVL1  | protein_coding | 0.654 | 4.51079E-53 |
| AATF | DHX57   | protein_coding | 0.698 | 2.86258E-63 |
| AATF | CRTC2   | protein_coding | 0.679 | 1.04917E-58 |
| AATF | EME1    | protein_coding | 0.643 | 8.48601E-51 |
| AATF | POLD1   | protein_coding | 0.679 | 1.01458E-58 |
| AATF | PSMB5   | protein_coding | 0.625 | 2.99999E-47 |
| AATF | CEP89   | protein_coding | 0.628 | 5.86263E-48 |
| AATF | PCNA    | protein_coding | 0.652 | 1.26907E-52 |
| AATF | TEPSIN  | protein_coding | 0.652 | 1.04369E-52 |
| AATF | G6PD    | protein_coding | 0.677 | 4.67641E-58 |
| AATF | DTX2    | protein_coding | 0.606 | 7.30612E-44 |
| AATF | CIZ1    | protein_coding | 0.685 | 6.26186E-60 |
| AATF | CSNK2B  | protein_coding | 0.608 | 3.74418E-44 |
| AATF | EIF3M   | protein_coding | 0.694 | 2.74834E-62 |
| AATF | DCAF13  | protein_coding | 0.601 | 5.26972E-43 |
| AATF | TRMT112 | protein_coding | 0.655 | 2.92897E-53 |
| AATF | NCAPH2  | protein_coding | 0.678 | 2.79497E-58 |
| AATF | OTUB1   | protein_coding | 0.622 | 1.08262E-46 |
| AATF | MRPL9   | protein_coding | 0.702 | 3.29449E-64 |
| AATF | GSK3A   | protein_coding | 0.618 | 6.0935E-46  |

|      |          |                |       |             |
|------|----------|----------------|-------|-------------|
| AATF | PPHLN1   | protein_coding | 0.616 | 9.68417E-46 |
| AATF | DDX23    | protein_coding | 0.634 | 3.97658E-49 |
| AATF | DEDD     | protein_coding | 0.606 | 8.13519E-44 |
| AATF | SMYD5    | protein_coding | 0.723 | 6.96246E-70 |
| AATF | SUPT6H   | protein_coding | 0.68  | 8.54566E-59 |
| AATF | ILF3     | protein_coding | 0.643 | 8.68259E-51 |
| AATF | DOHH     | protein_coding | 0.606 | 6.01647E-44 |
| AATF | WDR62    | protein_coding | 0.604 | 1.62814E-43 |
| AATF | AP4M1    | protein_coding | 0.656 | 2.00507E-53 |
| AATF | AP5Z1    | protein_coding | 0.722 | 1.72228E-69 |
| AATF | RNF25    | protein_coding | 0.653 | 6.17036E-53 |
| AATF | UTP14A   | protein_coding | 0.709 | 5.50342E-66 |
| AATF | PSMD8    | protein_coding | 0.622 | 1.05178E-46 |
| AATF | LEMD2    | protein_coding | 0.656 | 1.80718E-53 |
| AATF | RNF8     | protein_coding | 0.62  | 2.50538E-46 |
| AATF | DSN1     | protein_coding | 0.623 | 5.2745E-47  |
| AATF | C18orf21 | protein_coding | 0.684 | 6.83695E-60 |
| AATF | SFR1     | protein_coding | 0.606 | 6.95351E-44 |
| AATF | DDX49    | protein_coding | 0.664 | 2.43808E-55 |
| AATF | PRIM1    | protein_coding | 0.646 | 2.04308E-51 |
| AATF | RPL23    | protein_coding | 0.696 | 8.78007E-63 |
| AATF | U2AF2    | protein_coding | 0.674 | 2.16236E-57 |
| AATF | HCFC1    | protein_coding | 0.611 | 7.92128E-45 |
| AATF | NOL7     | protein_coding | 0.711 | 1.23627E-66 |
| AATF | MYO19    | protein_coding | 0.668 | 3.44978E-56 |
| AATF | TCF3     | protein_coding | 0.635 | 2.52696E-49 |
| AATF | TMEM115  | protein_coding | 0.654 | 4.70032E-53 |
| AATF | BUB1     | protein_coding | 0.626 | 1.55633E-47 |
| AATF | DCTPP1   | protein_coding | 0.67  | 1.61354E-56 |
| AATF | ISY1     | protein_coding | 0.625 | 2.31013E-47 |
| AATF | RARS     | protein_coding | 0.686 | 3.37578E-60 |
| AATF | ABCF2    | protein_coding | 0.686 | 3.34459E-60 |
| AATF | ZMYND19  | protein_coding | 0.629 | 3.77459E-48 |
| AATF | PSMD4    | protein_coding | 0.703 | 1.4237E-64  |
| AATF | UBE2M    | protein_coding | 0.662 | 9.83773E-55 |
| AATF | DRG1     | protein_coding | 0.696 | 9.5259E-63  |
| AATF | CUTA     | protein_coding | 0.608 | 3.59561E-44 |
| AATF | DPY30    | protein_coding | 0.641 | 1.76033E-50 |
| AATF | DDX56    | protein_coding | 0.686 | 2.71816E-60 |
| AATF | SYNGR2   | protein_coding | 0.659 | 3.67438E-54 |
| AATF | C15orf40 | protein_coding | 0.625 | 3.01357E-47 |
| AATF | NAGPA    | protein_coding | 0.623 | 6.71212E-47 |
| AATF | EIF3B    | protein_coding | 0.742 | 1.99506E-75 |
| AATF | DDX54    | protein_coding | 0.696 | 1.28363E-62 |

|      |         |                |       |             |
|------|---------|----------------|-------|-------------|
| AATF | PA2G4   | protein_coding | 0.73  | 7.46684E-72 |
| AATF | PGS1    | protein_coding | 0.671 | 8.38274E-57 |
| AATF | UTP6    | protein_coding | 0.833 | 1.3358E-110 |
| AATF | MAFG    | protein_coding | 0.638 | 6.88544E-50 |
| AATF | DYNLRB1 | protein_coding | 0.665 | 2.24537E-55 |
| AATF | DDX1    | protein_coding | 0.614 | 3.23444E-45 |
| AATF | SDF2    | protein_coding | 0.706 | 3.63597E-65 |
| AATF | SCRIB   | protein_coding | 0.604 | 1.49523E-43 |
| AATF | FTSJ1   | protein_coding | 0.675 | 1.03623E-57 |
| AATF | EIF2B5  | protein_coding | 0.755 | 2.18921E-79 |
| AATF | PPP1R35 | protein_coding | 0.622 | 8.66013E-47 |
| AATF | SNRPA1  | protein_coding | 0.605 | 1.21887E-43 |
| AATF | MED22   | protein_coding | 0.618 | 5.98989E-46 |
| AATF | MCM4    | protein_coding | 0.603 | 2.17122E-43 |
| AATF | SAMD1   | protein_coding | 0.608 | 3.08888E-44 |
| AATF | SUMO2   | protein_coding | 0.688 | 1.02278E-60 |
| AATF | SAFB    | protein_coding | 0.621 | 1.31309E-46 |
| AATF | EIF2D   | protein_coding | 0.657 | 8.46117E-54 |
| AATF | CDK7    | protein_coding | 0.634 | 3.99957E-49 |
| AATF | ERGIC3  | protein_coding | 0.606 | 8.78073E-44 |
| AATF | COG2    | protein_coding | 0.629 | 3.99597E-48 |
| AATF | KHDRBS1 | protein_coding | 0.67  | 1.70107E-56 |
| AATF | STX6    | protein_coding | 0.609 | 2.3016E-44  |
| AATF | XAB2    | protein_coding | 0.618 | 5.40942E-46 |
| AATF | NUSAP1  | protein_coding | 0.616 | 1.23233E-45 |
| AATF | DIS3L2  | protein_coding | 0.604 | 1.71914E-43 |
| AATF | CEP250  | protein_coding | 0.662 | 8.71513E-55 |
| AATF | CCT3    | protein_coding | 0.757 | 4.00813E-80 |
| AATF | ARPC3   | protein_coding | 0.613 | 4.19923E-45 |
| AATF | IK      | protein_coding | 0.748 | 2.97724E-77 |
| AATF | RBM28   | protein_coding | 0.623 | 6.86479E-47 |
| AATF | AARSD1  | protein_coding | 0.674 | 1.94694E-57 |
| AATF | CACYBP  | protein_coding | 0.703 | 2.09858E-64 |
| AATF | BUB3    | protein_coding | 0.604 | 1.65607E-43 |
| AATF | TRIM11  | protein_coding | 0.7   | 1.06395E-63 |
| AATF | CD2BP2  | protein_coding | 0.689 | 4.44941E-61 |
| AATF | BUD31   | protein_coding | 0.663 | 5.90158E-55 |
| AATF | RBMX2   | protein_coding | 0.651 | 1.86917E-52 |
| AATF | CDPF1   | protein_coding | 0.61  | 1.23547E-44 |
| AATF | DDX27   | protein_coding | 0.763 | 6.78931E-82 |
| AATF | NDUFAF2 | protein_coding | 0.628 | 8.11934E-48 |
| AATF | ESS2    | protein_coding | 0.657 | 7.97339E-54 |
| AATF | SLC35C2 | protein_coding | 0.65  | 2.8371E-52  |
| AATF | NUP37   | protein_coding | 0.729 | 2.45621E-71 |

|      |          |                |       |             |
|------|----------|----------------|-------|-------------|
| AATF | GPATCH3  | protein_coding | 0.653 | 8.33904E-53 |
| AATF | ZMAT2    | protein_coding | 0.602 | 3.73872E-43 |
| AATF | ZNF205   | protein_coding | 0.651 | 1.58477E-52 |
| AATF | POLR1C   | protein_coding | 0.628 | 8.31868E-48 |
| AATF | STMN1    | protein_coding | 0.681 | 3.86377E-59 |
| AATF | WASHC2A  | protein_coding | 0.633 | 6.06224E-49 |
| AATF | SUV39H1  | protein_coding | 0.633 | 7.92198E-49 |
| AATF | TSN      | protein_coding | 0.601 | 5.87842E-43 |
| AATF | PELP1    | protein_coding | 0.602 | 4.26385E-43 |
| AATF | KIF11    | protein_coding | 0.606 | 6.11756E-44 |
| AATF | MIIP     | protein_coding | 0.642 | 1.22484E-50 |
| AATF | ZNF174   | protein_coding | 0.683 | 1.66965E-59 |
| AATF | ANAPC5   | protein_coding | 0.607 | 5.96407E-44 |
| AATF | CCDC124  | protein_coding | 0.631 | 1.87713E-48 |
| AATF | COMMD5   | protein_coding | 0.605 | 1.13553E-43 |
| AATF | MEA1     | protein_coding | 0.678 | 2.27263E-58 |
| AATF | NOL11    | protein_coding | 0.682 | 2.06649E-59 |
| AATF | VAT1     | protein_coding | 0.606 | 7.34153E-44 |
| AATF | ANKRD27  | protein_coding | 0.633 | 7.60048E-49 |
| AATF | FLAD1    | protein_coding | 0.671 | 8.48511E-57 |
| AATF | RUSC1    | protein_coding | 0.627 | 1.00765E-47 |
| AATF | USP39    | protein_coding | 0.642 | 1.234E-50   |
| AATF | SCAF1    | protein_coding | 0.653 | 5.55379E-53 |
| AATF | MRTO4    | protein_coding | 0.661 | 1.23887E-54 |
| AATF | UBL7     | protein_coding | 0.643 | 8.48821E-51 |
| AATF | TLCD1    | protein_coding | 0.619 | 2.82627E-46 |
| AATF | CDCA5    | protein_coding | 0.663 | 4.98388E-55 |
| AATF | OLA1     | protein_coding | 0.625 | 2.90091E-47 |
| AATF | CDC20    | protein_coding | 0.677 | 4.66274E-58 |
| AATF | HNRNPC   | protein_coding | 0.63  | 2.3537E-48  |
| AATF | WDR75    | protein_coding | 0.62  | 2.1965E-46  |
| AATF | CASC3    | protein_coding | 0.731 | 3.46214E-72 |
| AATF | KIF20A   | protein_coding | 0.625 | 2.28545E-47 |
| AATF | RUNDC1   | protein_coding | 0.639 | 4.23913E-50 |
| AATF | PHF5A    | protein_coding | 0.607 | 4.0206E-44  |
| AATF | KPNB1    | protein_coding | 0.673 | 3.5369E-57  |
| AATF | NKIRAS2  | protein_coding | 0.75  | 1.00036E-77 |
| AATF | MAPKAPK5 | protein_coding | 0.617 | 6.94155E-46 |
| AATF | CCDC22   | protein_coding | 0.659 | 3.03336E-54 |
| AATF | CNOT11   | protein_coding | 0.606 | 8.30927E-44 |
| AATF | DDX39A   | protein_coding | 0.678 | 2.81077E-58 |
| AATF | WDR46    | protein_coding | 0.744 | 4.88853E-76 |
| AATF | POLG2    | protein_coding | 0.658 | 6.15563E-54 |
| AATF | RRM2     | protein_coding | 0.641 | 2.23261E-50 |

|      |          |                |       |             |
|------|----------|----------------|-------|-------------|
| AATF | NR2C2AP  | protein_coding | 0.748 | 3.11169E-77 |
| AATF | RBBP7    | protein_coding | 0.614 | 2.81146E-45 |
| AATF | DHX34    | protein_coding | 0.675 | 1.25686E-57 |
| AATF | RPL27    | protein_coding | 0.679 | 1.39141E-58 |
| AATF | MYBL2    | protein_coding | 0.662 | 7.7663E-55  |
| AATF | SLC26A11 | protein_coding | 0.648 | 6.10094E-52 |
| AATF | MED19    | protein_coding | 0.631 | 1.61048E-48 |
| AATF | TCF19    | protein_coding | 0.613 | 3.84585E-45 |
| AATF | BIRC5    | protein_coding | 0.681 | 5.75985E-59 |
| AATF | RPP21    | protein_coding | 0.689 | 5.00209E-61 |
| AATF | KIF4A    | protein_coding | 0.647 | 1.06702E-51 |
| AATF | SUPT4H1  | protein_coding | 0.726 | 1.62615E-70 |
| AATF | NLE1     | protein_coding | 0.768 | 1.05473E-83 |
| AATF | GTPBP4   | protein_coding | 0.626 | 1.32621E-47 |
| AATF | MRPL58   | protein_coding | 0.618 | 4.48034E-46 |
| AATF | RALY     | protein_coding | 0.74  | 8.96667E-75 |
| AATF | RAB13    | protein_coding | 0.61  | 1.34242E-44 |
| AATF | PARP1    | protein_coding | 0.621 | 1.35609E-46 |
| AATF | EWSR1    | protein_coding | 0.659 | 4.21744E-54 |
| AATF | AHSA1    | protein_coding | 0.612 | 5.2467E-45  |
| AATF | RAD51C   | protein_coding | 0.652 | 1.3887E-52  |
| AATF | ATRAID   | protein_coding | 0.626 | 1.7671E-47  |
| AATF | CFL1     | protein_coding | 0.638 | 9.22982E-50 |
| AATF | CDK5RAP1 | protein_coding | 0.695 | 1.86955E-62 |
| AATF | GNL2     | protein_coding | 0.628 | 7.20586E-48 |
| AATF | WRAP73   | protein_coding | 0.635 | 3.03673E-49 |
| AATF | SNRNPB   | protein_coding | 0.766 | 4.49869E-83 |
| AATF | BRIX1    | protein_coding | 0.678 | 2.23935E-58 |
| AATF | RBM45    | protein_coding | 0.669 | 2.24638E-56 |
| AATF | NXT1     | protein_coding | 0.612 | 6.44649E-45 |
| AATF | EXOC3    | protein_coding | 0.681 | 3.98682E-59 |
| AATF | UBE2S    | protein_coding | 0.667 | 8.28671E-56 |
| AATF | MAF1     | protein_coding | 0.609 | 2.20025E-44 |
| AATF | PIGU     | protein_coding | 0.678 | 1.92726E-58 |
| AATF | PDCD6    | protein_coding | 0.64  | 3.17192E-50 |
| AATF | RTF2     | protein_coding | 0.682 | 2.86304E-59 |
| AATF | SF3A2    | protein_coding | 0.673 | 2.88785E-57 |
| AATF | SNRPD2   | protein_coding | 0.647 | 1.31066E-51 |
| AATF | MRPL48   | protein_coding | 0.603 | 2.21311E-43 |
| AATF | RRP36    | protein_coding | 0.699 | 1.94616E-63 |
| AATF | RAB5C    | protein_coding | 0.614 | 3.19261E-45 |
| AATF | DTL      | protein_coding | 0.606 | 8.55289E-44 |
| AATF | DRAP1    | protein_coding | 0.604 | 1.55178E-43 |
| AATF | NCAPH    | protein_coding | 0.656 | 1.34833E-53 |

|      |            |                |       |             |
|------|------------|----------------|-------|-------------|
| AATF | SUPT5H     | protein_coding | 0.661 | 1.43512E-54 |
| AATF | TAF15      | protein_coding | 0.754 | 3.40874E-79 |
| AATF | NME1       | protein_coding | 0.686 | 3.62602E-60 |
| AATF | CDK4       | protein_coding | 0.604 | 1.79831E-43 |
| AATF | MKS1       | protein_coding | 0.64  | 3.48169E-50 |
| AATF | TFAP4      | protein_coding | 0.644 | 5.45985E-51 |
| AATF | ATP6AP1    | protein_coding | 0.662 | 8.81596E-55 |
| AATF | METTL2A    | protein_coding | 0.673 | 3.94473E-57 |
| AATF | CDKN3      | protein_coding | 0.633 | 6.97545E-49 |
| AATF | EIF2S2     | protein_coding | 0.658 | 6.60464E-54 |
| AATF | PFDN6      | protein_coding | 0.674 | 1.98851E-57 |
| AATF | UBE2O      | protein_coding | 0.699 | 1.87651E-63 |
| AATF | POP5       | protein_coding | 0.62  | 2.68241E-46 |
| AATF | TRIP4      | protein_coding | 0.664 | 2.73662E-55 |
| AATF | APEX2      | protein_coding | 0.634 | 5.084E-49   |
| AATF | BRMS1      | protein_coding | 0.669 | 2.01254E-56 |
| AATF | RFT1       | protein_coding | 0.616 | 1.20101E-45 |
| AATF | CMSS1      | protein_coding | 0.705 | 6.66615E-65 |
| AATF | SRP68      | protein_coding | 0.685 | 6.16633E-60 |
| AATF | LIN37      | protein_coding | 0.647 | 1.01162E-51 |
| AATF | MUTYH      | protein_coding | 0.644 | 5.83296E-51 |
| AATF | HDAC5      | protein_coding | 0.638 | 9.34047E-50 |
| AATF | GNL1       | protein_coding | 0.678 | 2.29628E-58 |
| AATF | TELO2      | protein_coding | 0.635 | 2.83236E-49 |
| AATF | HDAC11     | protein_coding | 0.637 | 1.33046E-49 |
| AATF | CC2D1B     | protein_coding | 0.67  | 1.55674E-56 |
| AATF | COIL       | protein_coding | 0.643 | 9.53223E-51 |
| AATF | UNK        | protein_coding | 0.642 | 1.23037E-50 |
| AATF | KIF2C      | protein_coding | 0.673 | 2.97003E-57 |
| AATF | RNASEH2A   | protein_coding | 0.707 | 1.67087E-65 |
| AATF | CSNK1D     | protein_coding | 0.719 | 1.14897E-68 |
| AATF | FAM220A    | protein_coding | 0.69  | 3.25071E-61 |
| AATF | C8orf59    | protein_coding | 0.606 | 6.75963E-44 |
| AATF | SIRT6      | protein_coding | 0.655 | 2.26047E-53 |
| AATF | XPO6       | protein_coding | 0.624 | 3.24E-47    |
| AATF | GPBP1      | protein_coding | 0.623 | 5.82133E-47 |
| AATF | IDH3B      | protein_coding | 0.604 | 1.7363E-43  |
| AATF | MRPL33     | protein_coding | 0.607 | 5.02835E-44 |
| AATF | CDKN2AIPNL | protein_coding | 0.682 | 2.35392E-59 |
| AATF | CBX8       | protein_coding | 0.604 | 1.40382E-43 |
| AATF | PYCR2      | protein_coding | 0.671 | 6.99258E-57 |
| AATF | DHX37      | protein_coding | 0.686 | 2.56204E-60 |
| AATF | HSP90AB1   | protein_coding | 0.675 | 8.49185E-58 |
| AATF | YKT6       | protein_coding | 0.632 | 1.08348E-48 |



|      |          |                |       |             |
|------|----------|----------------|-------|-------------|
| AATF | STK11IP  | protein_coding | 0.616 | 1.26359E-45 |
| AATF | SNU13    | protein_coding | 0.634 | 4.02993E-49 |
| AATF | PCLAF    | protein_coding | 0.648 | 6.33627E-52 |
| AATF | DPM2     | protein_coding | 0.637 | 1.50934E-49 |
| AATF | TMEM14C  | protein_coding | 0.618 | 4.80251E-46 |
| AATF | FKBP1A   | protein_coding | 0.609 | 1.9541E-44  |
| AATF | COPRS    | protein_coding | 0.641 | 1.83342E-50 |
| AATF | THAP11   | protein_coding | 0.64  | 3.12565E-50 |
| AATF | DDA1     | protein_coding | 0.645 | 3.63278E-51 |
| AATF | URM1     | protein_coding | 0.629 | 3.62151E-48 |
| AATF | SPDL1    | protein_coding | 0.632 | 1.23669E-48 |
| AATF | ILF2     | protein_coding | 0.738 | 3.44054E-74 |
| AATF | COMMD4   | protein_coding | 0.624 | 4.41863E-47 |
| AATF | SPC24    | protein_coding | 0.625 | 2.05038E-47 |
| AATF | PSMC3IP  | protein_coding | 0.615 | 1.65326E-45 |
| AATF | NEU1     | protein_coding | 0.657 | 9.35723E-54 |
| AATF | FAF1     | protein_coding | 0.656 | 1.35301E-53 |
| AATF | UBTF     | protein_coding | 0.673 | 2.90802E-57 |
| AATF | HNRNPM   | protein_coding | 0.622 | 8.50817E-47 |
| AATF | MRPL10   | protein_coding | 0.76  | 4.83387E-81 |
| AATF | ZNF692   | protein_coding | 0.629 | 4.5863E-48  |
| AATF | ABCF3    | protein_coding | 0.629 | 4.47366E-48 |
| AATF | WIPF2    | protein_coding | 0.631 | 1.88443E-48 |
| AATF | TMEM120B | protein_coding | 0.627 | 9.5139E-48  |
| AATF | BMS1     | protein_coding | 0.645 | 3.43435E-51 |
| AATF | RAD1     | protein_coding | 0.619 | 2.85596E-46 |
| AATF | CWC27    | protein_coding | 0.737 | 1.06421E-73 |
| AATF | CCT7     | protein_coding | 0.759 | 8.35848E-81 |
| AATF | MRPS7    | protein_coding | 0.654 | 3.56541E-53 |
| AATF | EIF1AD   | protein_coding | 0.639 | 5.08378E-50 |
| AATF | ITGB1BP1 | protein_coding | 0.643 | 8.99834E-51 |
| AATF | CANT1    | protein_coding | 0.699 | 1.58966E-63 |
| AATF | THOC6    | protein_coding | 0.656 | 1.45145E-53 |
| AATF | IQCC     | protein_coding | 0.628 | 7.87422E-48 |
| AATF | ZNF207   | protein_coding | 0.679 | 1.54054E-58 |
| AATF | METTL1   | protein_coding | 0.662 | 9.58156E-55 |
| AATF | CCDC43   | protein_coding | 0.681 | 4.33281E-59 |
| AATF | SKIV2L   | protein_coding | 0.65  | 3.66543E-52 |
| AATF | EHMT2    | protein_coding | 0.758 | 3.35998E-80 |
| AATF | VPS25    | protein_coding | 0.731 | 5.30288E-72 |
| AATF | TCOF1    | protein_coding | 0.788 | 9.49048E-91 |
| AATF | BOP1     | protein_coding | 0.611 | 8.29691E-45 |
| AATF | KRI1     | protein_coding | 0.672 | 5.49221E-57 |
| AATF | NOP56    | protein_coding | 0.707 | 1.3152E-65  |

|      |          |                |       |             |
|------|----------|----------------|-------|-------------|
| AATF | E2F1     | protein_coding | 0.612 | 7.31636E-45 |
| AATF | COPS6    | protein_coding | 0.695 | 2.37412E-62 |
| AATF | GPS1     | protein_coding | 0.675 | 1.36781E-57 |
| AATF | RPIA     | protein_coding | 0.644 | 4.70994E-51 |
| AATF | HARS2    | protein_coding | 0.683 | 1.84049E-59 |
| AATF | GPKOW    | protein_coding | 0.682 | 3.1925E-59  |
| AATF | TTC9C    | protein_coding | 0.607 | 5.56582E-44 |
| AATF | C17orf80 | protein_coding | 0.602 | 4.33806E-43 |
| AATF | ACD      | protein_coding | 0.729 | 1.33347E-71 |
| AATF | TPRKB    | protein_coding | 0.691 | 1.50361E-61 |
| AATF | KRTCAP2  | protein_coding | 0.631 | 1.7343E-48  |
| AATF | PFDN1    | protein_coding | 0.634 | 4.71443E-49 |
| AATF | ABCF1    | protein_coding | 0.703 | 1.50892E-64 |
| AATF | NABP2    | protein_coding | 0.743 | 1.17437E-75 |
| AATF | SSB      | protein_coding | 0.621 | 1.42665E-46 |
| AATF | TIGD5    | protein_coding | 0.617 | 8.50337E-46 |
| AATF | REXO4    | protein_coding | 0.677 | 3.80013E-58 |
| AATF | WDR74    | protein_coding | 0.616 | 1.45561E-45 |
| AATF | SMG9     | protein_coding | 0.617 | 6.48266E-46 |
| AATF | HNRNPA1  | protein_coding | 0.643 | 6.6427E-51  |
| AATF | MAD2L1BP | protein_coding | 0.607 | 4.01465E-44 |
| AATF | RAE1     | protein_coding | 0.69  | 2.93372E-61 |
| AATF | MED24    | protein_coding | 0.724 | 3.78029E-70 |
| AATF | RBM17    | protein_coding | 0.602 | 4.46182E-43 |
| AATF | METTL18  | protein_coding | 0.62  | 2.17951E-46 |
| AATF | TMUB2    | protein_coding | 0.701 | 6.45805E-64 |
| AATF | CKS2     | protein_coding | 0.616 | 1.28771E-45 |
| AATF | ZNF622   | protein_coding | 0.607 | 5.64924E-44 |
| AATF | CHAF1A   | protein_coding | 0.636 | 2.06571E-49 |
| AATF | HAUS1    | protein_coding | 0.65  | 2.85667E-52 |
| AATF | NMT1     | protein_coding | 0.626 | 1.56318E-47 |
| AATF | TMEM201  | protein_coding | 0.619 | 3.47433E-46 |
| AATF | SSR2     | protein_coding | 0.603 | 2.98295E-43 |
| AATF | C12orf10 | protein_coding | 0.69  | 3.12532E-61 |
| AATF | LSM4     | protein_coding | 0.625 | 2.27938E-47 |
| AATF | RPL38    | protein_coding | 0.623 | 5.00993E-47 |
| AATF | NUF2     | protein_coding | 0.627 | 9.74304E-48 |
| AATF | GM2A     | protein_coding | 0.604 | 1.83215E-43 |
| AATF | MANBAL   | protein_coding | 0.68  | 8.54084E-59 |
| AATF | NOC4L    | protein_coding | 0.648 | 7.93031E-52 |
| AATF | PTTG1    | protein_coding | 0.698 | 2.90302E-63 |
| AATF | AGBL5    | protein_coding | 0.662 | 7.14007E-55 |
| AATF | PYM1     | protein_coding | 0.641 | 2.26288E-50 |
| AATF | AURKB    | protein_coding | 0.659 | 2.90522E-54 |

|      |          |                |       |             |
|------|----------|----------------|-------|-------------|
| AATF | ATP6V1E1 | protein_coding | 0.673 | 3.82633E-57 |
| AATF | HDGFL2   | protein_coding | 0.666 | 1.19677E-55 |
| AATF | LSM2     | protein_coding | 0.724 | 4.39188E-70 |
| AATF | RBM15B   | protein_coding | 0.606 | 7.02801E-44 |
| AATF | XYLT2    | protein_coding | 0.66  | 2.06865E-54 |
| AATF | SNRPD1   | protein_coding | 0.677 | 4.32086E-58 |
| AATF | LAS1L    | protein_coding | 0.694 | 2.74961E-62 |
| AATF | ZNF346   | protein_coding | 0.63  | 3.15514E-48 |
| AATF | ALG3     | protein_coding | 0.632 | 1.21506E-48 |
| AATF | MTFR2    | protein_coding | 0.623 | 5.26291E-47 |
| AATF | RBM14    | protein_coding | 0.649 | 4.77484E-52 |
| AATF | ANKZF1   | protein_coding | 0.685 | 4.23282E-60 |
| AATF | SAFB2    | protein_coding | 0.65  | 3.60085E-52 |
| AATF | STX4     | protein_coding | 0.689 | 6.40058E-61 |
| AATF | HGS      | protein_coding | 0.607 | 4.07683E-44 |
| AATF | CYBC1    | protein_coding | 0.631 | 2.14423E-48 |
| AATF | PDCD2L   | protein_coding | 0.621 | 1.37224E-46 |
| AATF | PWP1     | protein_coding | 0.711 | 2.10599E-66 |
| AATF | DPF2     | protein_coding | 0.617 | 8.52691E-46 |
| AATF | DTNB     | protein_coding | 0.635 | 3.68067E-49 |
| AATF | CEP131   | protein_coding | 0.765 | 8.12774E-83 |
| AATF | EXOSC1   | protein_coding | 0.668 | 4.37404E-56 |
| AATF | DNTTIP2  | protein_coding | 0.65  | 2.65483E-52 |
| AATF | TPM3     | protein_coding | 0.681 | 3.95089E-59 |
| AATF | CKS1B    | protein_coding | 0.711 | 1.3775E-66  |
| AATF | PHF14    | protein_coding | 0.617 | 7.2695E-46  |
| AATF | GPATCH4  | protein_coding | 0.666 | 1.21488E-55 |
| AATF | EXO1     | protein_coding | 0.65  | 2.32126E-52 |
| AATF | RPUSD1   | protein_coding | 0.66  | 2.37026E-54 |
| AATF | NDC80    | protein_coding | 0.627 | 1.02552E-47 |
| AATF | THOC7    | protein_coding | 0.625 | 2.94332E-47 |
| AATF | RBM22    | protein_coding | 0.685 | 4.77391E-60 |
| AATF | HAUS5    | protein_coding | 0.668 | 4.05201E-56 |
| AATF | KXD1     | protein_coding | 0.694 | 3.31925E-62 |
| AATF | RAB24    | protein_coding | 0.637 | 1.05008E-49 |
| AATF | NAT10    | protein_coding | 0.652 | 1.11234E-52 |
| AATF | MED10    | protein_coding | 0.622 | 9.85997E-47 |
| AATF | GTPBP3   | protein_coding | 0.626 | 1.48304E-47 |
| AATF | ZWINT    | protein_coding | 0.641 | 2.28045E-50 |
| AATF | PPIA     | protein_coding | 0.68  | 6.50298E-59 |
| AATF | RACGAP1  | protein_coding | 0.675 | 1.33427E-57 |
| AATF | TMEM206  | protein_coding | 0.67  | 1.51568E-56 |
| AATF | PDZD11   | protein_coding | 0.663 | 4.34254E-55 |
| AATF | MCM6     | protein_coding | 0.657 | 9.47606E-54 |

|      |          |                |       |             |
|------|----------|----------------|-------|-------------|
| AATF | PES1     | protein_coding | 0.69  | 2.87289E-61 |
| AATF | EIF4A3   | protein_coding | 0.745 | 4.35921E-76 |
| AATF | SLC4A1AP | protein_coding | 0.639 | 4.37426E-50 |
| AATF | PRPF31   | protein_coding | 0.609 | 2.62294E-44 |
| AATF | PSMD2    | protein_coding | 0.636 | 2.30089E-49 |
| AATF | PIP4K2B  | protein_coding | 0.66  | 2.36052E-54 |
| AATF | ARPC5    | protein_coding | 0.616 | 1.10826E-45 |
| AATF | NELFE    | protein_coding | 0.756 | 8.33869E-80 |
| AATF | AAAS     | protein_coding | 0.702 | 3.05736E-64 |
| AATF | GDI1     | protein_coding | 0.611 | 8.44897E-45 |
| AATF | ANP32A   | protein_coding | 0.605 | 1.07517E-43 |
| AATF | MRGBP    | protein_coding | 0.678 | 1.90009E-58 |
| AATF | TSG101   | protein_coding | 0.627 | 1.22144E-47 |
| AATF | SMG5     | protein_coding | 0.665 | 1.44254E-55 |
| AATF | GMPPA    | protein_coding | 0.609 | 2.15528E-44 |
| AATF | PRELID1  | protein_coding | 0.608 | 2.84836E-44 |
| AATF | TUBB     | protein_coding | 0.682 | 2.59491E-59 |
| AATF | NVL      | protein_coding | 0.663 | 4.88478E-55 |
| AATF | FANCG    | protein_coding | 0.672 | 5.96296E-57 |
| AATF | USF1     | protein_coding | 0.627 | 9.67654E-48 |
| AATF | MTA3     | protein_coding | 0.638 | 8.88495E-50 |
| AATF | INTS8    | protein_coding | 0.632 | 1.35768E-48 |
| AATF | TOP2A    | protein_coding | 0.642 | 1.04725E-50 |
| AATF | NIFK     | protein_coding | 0.609 | 1.82363E-44 |
| AATF | NARF     | protein_coding | 0.656 | 1.3351E-53  |
| AATF | COPS7B   | protein_coding | 0.624 | 3.33943E-47 |
| AATF | GGA3     | protein_coding | 0.655 | 2.26175E-53 |
| AATF | LRRC59   | protein_coding | 0.673 | 3.03009E-57 |
| AATF | TIPIN    | protein_coding | 0.629 | 3.60054E-48 |
| AATF | UTP18    | protein_coding | 0.801 | 3.4319E-96  |
| AATF | RPS7     | protein_coding | 0.604 | 1.59347E-43 |
| AATF | CDCA8    | protein_coding | 0.634 | 5.00084E-49 |
| AATF | VPS33A   | protein_coding | 0.658 | 7.6027E-54  |
| AATF | CCNF     | protein_coding | 0.621 | 1.52234E-46 |
| AATF | MAGOH    | protein_coding | 0.669 | 2.11208E-56 |
| AATF | EEF1E1   | protein_coding | 0.603 | 2.02554E-43 |
| AATF | SNRPC    | protein_coding | 0.757 | 6.59512E-80 |
| AATF | AP2M1    | protein_coding | 0.621 | 1.49432E-46 |
| AATF | SLC39A1  | protein_coding | 0.628 | 6.43863E-48 |
| AATF | MED15    | protein_coding | 0.601 | 6.61866E-43 |
| AATF | NEK2     | protein_coding | 0.64  | 3.30802E-50 |
| AATF | FKBPL    | protein_coding | 0.656 | 1.4859E-53  |
| AATF | ERAL1    | protein_coding | 0.763 | 5.36527E-82 |
| AATF | VPS45    | protein_coding | 0.642 | 1.22057E-50 |

|      |          |                |       |             |
|------|----------|----------------|-------|-------------|
| AATF | POC5     | protein_coding | 0.63  | 2.31975E-48 |
| AATF | CDC123   | protein_coding | 0.664 | 3.47116E-55 |
| AATF | ZMAT5    | protein_coding | 0.634 | 3.87474E-49 |
| AATF | TRMU     | protein_coding | 0.611 | 8.59087E-45 |
| AATF | SNAPIN   | protein_coding | 0.676 | 6.97697E-58 |
| AATF | DUSP12   | protein_coding | 0.672 | 6.17468E-57 |
| AATF | MCM2     | protein_coding | 0.652 | 1.00681E-52 |
| AATF | CCNB2    | protein_coding | 0.645 | 2.8923E-51  |
| AATF | PQBP1    | protein_coding | 0.655 | 2.39453E-53 |
| AATF | RECQL4   | protein_coding | 0.64  | 2.84111E-50 |
| AATF | DTYMK    | protein_coding | 0.697 | 6.92324E-63 |
| AATF | MCM7     | protein_coding | 0.697 | 6.73404E-63 |
| AATF | FTSJ3    | protein_coding | 0.767 | 1.999E-83   |
| AATF | LMNB2    | protein_coding | 0.638 | 7.82242E-50 |
| AATF | MRPL45   | protein_coding | 0.713 | 3.86555E-67 |
| AATF | NUP155   | protein_coding | 0.614 | 2.57518E-45 |
| AATF | DDX52    | protein_coding | 0.708 | 9.23087E-66 |
| AATF | GTF2F1   | protein_coding | 0.628 | 6.24812E-48 |
| AATF | FARSB    | protein_coding | 0.688 | 9.0013E-61  |
| AATF | PPIH     | protein_coding | 0.657 | 1.04098E-53 |
| AATF | CHTOP    | protein_coding | 0.662 | 6.54004E-55 |
| AATF | RFXANK   | protein_coding | 0.709 | 4.94191E-66 |
| AATF | HJURP    | protein_coding | 0.618 | 5.2044E-46  |
| AATF | NRBP1    | protein_coding | 0.686 | 2.6417E-60  |
| AATF | BANF1    | protein_coding | 0.63  | 2.305E-48   |
| AATF | SCAMP3   | protein_coding | 0.746 | 1.9737E-76  |
| AATF | UBE2I    | protein_coding | 0.676 | 6.22728E-58 |
| AATF | CRNKL1   | protein_coding | 0.652 | 1.27047E-52 |
| AATF | UIMC1    | protein_coding | 0.643 | 7.463E-51   |
| AATF | NCAPG    | protein_coding | 0.64  | 2.96117E-50 |
| AATF | MCM3     | protein_coding | 0.674 | 1.99874E-57 |
| AATF | MED8     | protein_coding | 0.643 | 7.28874E-51 |
| AATF | LMNA     | protein_coding | 0.644 | 6.16186E-51 |
| AATF | PFDN4    | protein_coding | 0.627 | 1.19569E-47 |
| AATF | ATP6V1F  | protein_coding | 0.632 | 1.34716E-48 |
| AATF | SART1    | protein_coding | 0.719 | 8.31862E-69 |
| AATF | ADSL     | protein_coding | 0.669 | 2.16154E-56 |
| AATF | EXOSC5   | protein_coding | 0.634 | 4.20027E-49 |
| AATF | MAN1B1   | protein_coding | 0.614 | 2.73875E-45 |
| AATF | TRNAU1AP | protein_coding | 0.656 | 1.45125E-53 |
| AATF | MRM1     | protein_coding | 0.652 | 9.63504E-53 |
| AATF | ITPA     | protein_coding | 0.637 | 1.35913E-49 |
| AATF | CDK5     | protein_coding | 0.613 | 4.2136E-45  |
| AATF | PSMD13   | protein_coding | 0.606 | 6.19897E-44 |

|      |          |                |       |             |
|------|----------|----------------|-------|-------------|
| AATF | IRF3     | protein_coding | 0.612 | 7.57913E-45 |
| AATF | PRKAG1   | protein_coding | 0.651 | 2.17105E-52 |
| AATF | PRC1     | protein_coding | 0.631 | 1.80966E-48 |
| AATF | DCTN1    | protein_coding | 0.627 | 1.17098E-47 |
| AATF | HNRNPL   | protein_coding | 0.667 | 6.97135E-56 |
| AATF | HNRNPA3  | protein_coding | 0.641 | 2.30659E-50 |
| AATF | BTF3     | protein_coding | 0.627 | 1.23882E-47 |
| AATF | UBE2T    | protein_coding | 0.722 | 2.2814E-69  |
| AATF | ASF1B    | protein_coding | 0.644 | 5.32706E-51 |
| AATF | FXR1     | protein_coding | 0.614 | 3.20527E-45 |
| AATF | EIF3G    | protein_coding | 0.608 | 2.76872E-44 |
| AATF | DROSHA   | protein_coding | 0.629 | 4.99921E-48 |
| AATF | FOXK2    | protein_coding | 0.628 | 7.37937E-48 |
| AATF | CENPW    | protein_coding | 0.653 | 6.86747E-53 |
| AATF | TPD52L2  | protein_coding | 0.7   | 1.18378E-63 |
| AATF | MSTO1    | protein_coding | 0.637 | 1.34103E-49 |
| AATF | GLMN     | protein_coding | 0.602 | 3.51706E-43 |
| AATF | CCDC77   | protein_coding | 0.633 | 7.23882E-49 |
| AATF | PPP1CC   | protein_coding | 0.656 | 1.30427E-53 |
| AATF | ITGB3BP  | protein_coding | 0.632 | 1.38169E-48 |
| AATF | UCK2     | protein_coding | 0.687 | 2.20219E-60 |
| AATF | NSFL1C   | protein_coding | 0.671 | 8.94858E-57 |
| AATF | TMEM199  | protein_coding | 0.77  | 1.58058E-84 |
| AATF | COLGALT1 | protein_coding | 0.618 | 5.64436E-46 |
| AATF | FAM189B  | protein_coding | 0.691 | 1.58981E-61 |
| AATF | KAT2A    | protein_coding | 0.712 | 1.09757E-66 |
| AATF | GINS1    | protein_coding | 0.623 | 7.2227E-47  |
| AATF | PRR3     | protein_coding | 0.631 | 1.6772E-48  |
| AATF | H2AFX    | protein_coding | 0.642 | 1.43528E-50 |
| AATF | BLOC1S3  | protein_coding | 0.655 | 3.26308E-53 |
| AATF | PPOX     | protein_coding | 0.669 | 2.72147E-56 |
| AATF | TIGD6    | protein_coding | 0.611 | 8.60229E-45 |
| AATF | GTF3C2   | protein_coding | 0.631 | 1.6028E-48  |
| AATF | INTS11   | protein_coding | 0.611 | 1.03315E-44 |
| AATF | CXXC1    | protein_coding | 0.626 | 1.87748E-47 |
| AATF | RPP38    | protein_coding | 0.678 | 1.95514E-58 |
| AATF | ZBTB17   | protein_coding | 0.643 | 8.07145E-51 |
| AATF | GMEB2    | protein_coding | 0.615 | 1.79011E-45 |
| AATF | TAF11    | protein_coding | 0.629 | 4.24222E-48 |
| AATF | LLPH     | protein_coding | 0.623 | 7.43397E-47 |
| AATF | IGBP1    | protein_coding | 0.647 | 1.00406E-51 |
| AATF | TRMT6    | protein_coding | 0.681 | 4.49441E-59 |
| AATF | MFAP1    | protein_coding | 0.616 | 1.35589E-45 |
| AATF | SF3B2    | protein_coding | 0.658 | 5.58191E-54 |

|      |          |                |       |             |
|------|----------|----------------|-------|-------------|
| AATF | GTF3C5   | protein_coding | 0.637 | 1.52868E-49 |
| AATF | PSMB3    | protein_coding | 0.664 | 2.65425E-55 |
| AATF | CDK5RAP3 | protein_coding | 0.666 | 1.40032E-55 |
| AATF | NONO     | protein_coding | 0.652 | 1.09593E-52 |
| AATF | CDCA3    | protein_coding | 0.632 | 9.90194E-49 |
| AATF | DNAJC8   | protein_coding | 0.627 | 9.35706E-48 |
| AATF | DBF4B    | protein_coding | 0.651 | 1.65857E-52 |
| AATF | INTS4    | protein_coding | 0.616 | 1.20504E-45 |
| AATF | PRIM2    | protein_coding | 0.684 | 1.06712E-59 |
| AATF | MCM5     | protein_coding | 0.645 | 2.43424E-51 |
| AATF | SNAPC2   | protein_coding | 0.602 | 3.79767E-43 |
| AATF | ACTR5    | protein_coding | 0.617 | 7.5145E-46  |
| AATF | NAP1L4   | protein_coding | 0.61  | 1.5107E-44  |
| AATF | SAC3D1   | protein_coding | 0.628 | 6.98572E-48 |
| AATF | BAX      | protein_coding | 0.615 | 2.17569E-45 |
| AATF | SKA1     | protein_coding | 0.634 | 4.35552E-49 |
| AATF | NSF      | protein_coding | 0.723 | 8.26892E-70 |
| AATF | EIF3H    | protein_coding | 0.607 | 5.60381E-44 |
| AATF | YAE1     | protein_coding | 0.642 | 1.17713E-50 |
| AATF | NFKBIL1  | protein_coding | 0.669 | 2.50072E-56 |
| AATF | SRP14    | protein_coding | 0.601 | 5.41653E-43 |
| AATF | RAC1     | protein_coding | 0.611 | 8.73754E-45 |
| AATF | RBM8A    | protein_coding | 0.665 | 2.22855E-55 |
| AATF | PRPF6    | protein_coding | 0.733 | 9.57751E-73 |
| AATF | MORC2    | protein_coding | 0.605 | 1.1909E-43  |
| AATF | SLC41A3  | protein_coding | 0.659 | 3.46523E-54 |
| AATF | EDC3     | protein_coding | 0.703 | 1.52501E-64 |
| AATF | SMARCA4  | protein_coding | 0.613 | 5.02176E-45 |
| AATF | BYSL     | protein_coding | 0.661 | 1.27723E-54 |
| AATF | NACA     | protein_coding | 0.678 | 1.74125E-58 |
| AATF | LAMTOR5  | protein_coding | 0.647 | 1.12778E-51 |
| AATF | CAD      | protein_coding | 0.663 | 4.51709E-55 |
| AATF | NCAPD2   | protein_coding | 0.611 | 1.07662E-44 |
| AATF | CHMP4B   | protein_coding | 0.639 | 5.98425E-50 |
| AATF | VPS11    | protein_coding | 0.601 | 4.88022E-43 |
| AATF | UFC1     | protein_coding | 0.659 | 2.98186E-54 |
| AATF | PCGF1    | protein_coding | 0.677 | 3.09431E-58 |
| AATF | NT5C3B   | protein_coding | 0.66  | 2.25379E-54 |
| AATF | RECQL5   | protein_coding | 0.677 | 3.89448E-58 |
| AATF | PSMA4    | protein_coding | 0.616 | 1.39535E-45 |
| AATF | NUP107   | protein_coding | 0.604 | 1.75465E-43 |
| AATF | TRMT61A  | protein_coding | 0.644 | 5.96625E-51 |
| AATF | SLC50A1  | protein_coding | 0.615 | 2.12659E-45 |
| AATF | SF3A3    | protein_coding | 0.668 | 3.96852E-56 |

|      |          |                |       |             |
|------|----------|----------------|-------|-------------|
| AATF | SUGP1    | protein_coding | 0.707 | 2.00261E-65 |
| AATF | AATF     | protein_coding | 1     | 0           |
| AATF | PDCL3    | protein_coding | 0.68  | 6.92059E-59 |
| AATF | UBAP2L   | protein_coding | 0.663 | 4.49427E-55 |
| AATF | TBC1D31  | protein_coding | 0.61  | 1.40373E-44 |
| AATF | NRF1     | protein_coding | 0.626 | 1.96316E-47 |
| AATF | STK25    | protein_coding | 0.655 | 2.71758E-53 |
| AATF | CDT1     | protein_coding | 0.688 | 7.52009E-61 |
| AATF | TMEM79   | protein_coding | 0.624 | 3.62129E-47 |
| AATF | ERI3     | protein_coding | 0.663 | 4.08228E-55 |
| AATF | DNAJC7   | protein_coding | 0.813 | 3.1352E-101 |
| AATF | GMPS     | protein_coding | 0.612 | 6.69406E-45 |
| AATF | ACBD6    | protein_coding | 0.68  | 7.2939E-59  |
| AATF | C20orf96 | protein_coding | 0.605 | 1.25642E-43 |
| AATF | MAPK3    | protein_coding | 0.671 | 1.06025E-56 |
| AATF | PKN1     | protein_coding | 0.663 | 5.93609E-55 |
| AATF | CBX3     | protein_coding | 0.695 | 1.50904E-62 |
| AATF | GPATCH1  | protein_coding | 0.609 | 1.86604E-44 |
| AATF | CPSF4    | protein_coding | 0.662 | 1.02709E-54 |
| AATF | ARFGAP1  | protein_coding | 0.651 | 1.48244E-52 |
| AATF | UBE2Q1   | protein_coding | 0.663 | 4.08419E-55 |
| AATF | FAM192A  | protein_coding | 0.623 | 6.18175E-47 |
| AATF | RRP12    | protein_coding | 0.644 | 4.72155E-51 |
| AATF | TOMM40   | protein_coding | 0.65  | 2.48169E-52 |
| AATF | RPL23A   | protein_coding | 0.647 | 1.35085E-51 |
| AATF | NT5C     | protein_coding | 0.667 | 6.27438E-56 |
| AATF | CNP      | protein_coding | 0.602 | 4.17249E-43 |
| AATF | CLIC1    | protein_coding | 0.667 | 6.22408E-56 |
| AATF | PPM1G    | protein_coding | 0.761 | 2.44169E-81 |
| AATF | SIRT7    | protein_coding | 0.737 | 7.36482E-74 |
| AATF | CHCHD2   | protein_coding | 0.621 | 1.68096E-46 |
| AATF | KCTD2    | protein_coding | 0.651 | 1.72486E-52 |
| AATF | NRM      | protein_coding | 0.615 | 1.47146E-45 |
| AATF | DDX41    | protein_coding | 0.688 | 9.94944E-61 |
| AATF | KPNA2    | protein_coding | 0.714 | 2.56412E-67 |
| AATF | EIF2B4   | protein_coding | 0.728 | 3.91185E-71 |
| AATF | NGDN     | protein_coding | 0.665 | 1.76192E-55 |
| AATF | NCL      | protein_coding | 0.613 | 3.40866E-45 |
| AATF | MRPS23   | protein_coding | 0.779 | 1.93945E-87 |
| AATF | CCT6A    | protein_coding | 0.713 | 4.24835E-67 |
| AATF | CHEK1    | protein_coding | 0.62  | 2.56804E-46 |
| AATF | FAM49B   | protein_coding | 0.636 | 1.67079E-49 |
| AATF | PSMC4    | protein_coding | 0.649 | 4.56761E-52 |
| AATF | ZNHIT3   | protein_coding | 0.829 | 2.3696E-108 |



|      |          |                |       |             |
|------|----------|----------------|-------|-------------|
| AATF | CCHCR1   | protein_coding | 0.724 | 4.199E-70   |
| AATF | TMEM147  | protein_coding | 0.61  | 1.56643E-44 |
| AATF | TARDBP   | protein_coding | 0.63  | 3.00544E-48 |
| AATF | CENPM    | protein_coding | 0.682 | 3.39074E-59 |
| AATF | RPUSD3   | protein_coding | 0.617 | 9.31391E-46 |
| AATF | TACC3    | protein_coding | 0.663 | 5.18397E-55 |
| AATF | CCT2     | protein_coding | 0.716 | 9.44586E-68 |
| AATF | TBC1D16  | protein_coding | 0.603 | 2.27189E-43 |
| AATF | ATXN7L3  | protein_coding | 0.601 | 5.39457E-43 |
| AATF | CLTA     | protein_coding | 0.706 | 3.44396E-65 |
| AATF | SNF8     | protein_coding | 0.757 | 3.69456E-80 |
| AATF | C14orf93 | protein_coding | 0.629 | 5.17102E-48 |
| AATF | CLCN2    | protein_coding | 0.624 | 3.18732E-47 |
| AATF | CPSF6    | protein_coding | 0.609 | 2.15709E-44 |
| AATF | HSPA4    | protein_coding | 0.62  | 2.18858E-46 |
| AATF | RUVBL2   | protein_coding | 0.647 | 9.59585E-52 |
| AATF | TRIP13   | protein_coding | 0.672 | 5.46166E-57 |
| AATF | KIFC1    | protein_coding | 0.689 | 6.85621E-61 |
| AATF | NUP62    | protein_coding | 0.619 | 3.95195E-46 |
| AATF | NEDD8    | protein_coding | 0.634 | 5.74229E-49 |
| AATF | ASB6     | protein_coding | 0.614 | 3.33797E-45 |
| AATF | RBM10    | protein_coding | 0.723 | 6.47886E-70 |
| AATF | CBX1     | protein_coding | 0.678 | 2.58214E-58 |
| AATF | RNPS1    | protein_coding | 0.692 | 1.27767E-61 |
| AATF | NAP1L1   | protein_coding | 0.642 | 1.05286E-50 |
| AATF | COA6     | protein_coding | 0.613 | 3.77831E-45 |
| AATF | MRPL17   | protein_coding | 0.609 | 2.25091E-44 |
| AATF | SNX8     | protein_coding | 0.643 | 7.15951E-51 |
| AATF | BRAT1    | protein_coding | 0.677 | 4.24144E-58 |
| AATF | PPME1    | protein_coding | 0.62  | 2.6648E-46  |
| AATF | DYNC1LI1 | protein_coding | 0.612 | 5.97101E-45 |
| AATF | SLC25A19 | protein_coding | 0.602 | 3.02309E-43 |
| AATF | TXNDC9   | protein_coding | 0.605 | 1.10806E-43 |
| AATF | FANCI    | protein_coding | 0.643 | 7.2347E-51  |
| AATF | GNPDA1   | protein_coding | 0.605 | 1.23833E-43 |
| AATF | AKAP8L   | protein_coding | 0.659 | 3.4222E-54  |
| AATF | HDGF     | protein_coding | 0.605 | 1.04549E-43 |
| AATF | CENPB    | protein_coding | 0.654 | 4.20969E-53 |
| AATF | SURF6    | protein_coding | 0.613 | 3.81171E-45 |
| AATF | DAD1     | protein_coding | 0.626 | 1.90037E-47 |
| AATF | CCDC137  | protein_coding | 0.775 | 5.47312E-86 |
| AATF | GGNBP2   | protein_coding | 0.648 | 9.03238E-52 |
| AATF | SNRPE    | protein_coding | 0.707 | 1.41342E-65 |
| AATF | NME6     | protein_coding | 0.691 | 2.12303E-61 |

|      |         |                |       |             |
|------|---------|----------------|-------|-------------|
| AATF | PUF60   | protein_coding | 0.615 | 1.70129E-45 |
| AATF | GBA     | protein_coding | 0.61  | 1.42721E-44 |
| AATF | PRPF19  | protein_coding | 0.682 | 2.48851E-59 |
| AATF | RAN     | protein_coding | 0.664 | 2.61213E-55 |
| AATF | RABIF   | protein_coding | 0.617 | 8.29552E-46 |
| AATF | NOP58   | protein_coding | 0.653 | 8.6283E-53  |
| AATF | TOMM34  | protein_coding | 0.651 | 1.9573E-52  |
| AATF | NPM1    | protein_coding | 0.666 | 9.49837E-56 |
| AATF | ORC1    | protein_coding | 0.618 | 4.98994E-46 |
| AATF | SF3B4   | protein_coding | 0.74  | 1.2018E-74  |
| AATF | MTMR14  | protein_coding | 0.653 | 8.64756E-53 |
| AATF | EPRS    | protein_coding | 0.611 | 8.82916E-45 |
| AATF | POLR3C  | protein_coding | 0.726 | 1.21208E-70 |
| AATF | CENPA   | protein_coding | 0.62  | 2.19389E-46 |
| AATF | UTP11   | protein_coding | 0.607 | 4.89713E-44 |
| AATF | HRAS    | protein_coding | 0.618 | 4.61848E-46 |
| AATF | WDR4    | protein_coding | 0.682 | 2.00031E-59 |
| AATF | VPS72   | protein_coding | 0.778 | 3.54106E-87 |
| AATF | PTBP1   | protein_coding | 0.645 | 3.13635E-51 |
| AATF | SNRPG   | protein_coding | 0.659 | 2.90484E-54 |
| AATF | RUVBL1  | protein_coding | 0.741 | 7.22725E-75 |
| AATF | RCCD1   | protein_coding | 0.618 | 5.75549E-46 |
| AATF | B4GALT3 | protein_coding | 0.677 | 3.09408E-58 |
| AATF | NAIF1   | protein_coding | 0.601 | 5.86126E-43 |
| AATF | SPC25   | protein_coding | 0.675 | 1.3577E-57  |
| AATF | PI4KB   | protein_coding | 0.623 | 6.32738E-47 |
| AATF | DAP3    | protein_coding | 0.638 | 7.57402E-50 |
| AATF | NAT9    | protein_coding | 0.736 | 2.25855E-73 |
| AATF | RPL17   | protein_coding | 0.634 | 4.27141E-49 |
| AATF | ATP5MC2 | protein_coding | 0.628 | 8.1135E-48  |
| AATF | SUPT7L  | protein_coding | 0.616 | 1.26558E-45 |
| AATF | POP4    | protein_coding | 0.632 | 9.29418E-49 |
| AATF | KAT7    | protein_coding | 0.604 | 1.44695E-43 |
| AATF | WDR53   | protein_coding | 0.651 | 2.22144E-52 |
| AATF | BRAP    | protein_coding | 0.635 | 2.58624E-49 |
| AATF | APEX1   | protein_coding | 0.621 | 1.40924E-46 |
| AATF | MTCH1   | protein_coding | 0.647 | 1.00387E-51 |
| AATF | POLR2G  | protein_coding | 0.69  | 2.87574E-61 |
| AATF | STARD3  | protein_coding | 0.76  | 5.74171E-81 |
| AATF | RHOA    | protein_coding | 0.606 | 8.25162E-44 |
| AATF | ACTL6A  | protein_coding | 0.604 | 1.6829E-43  |
| AATF | RHNO1   | protein_coding | 0.604 | 1.42243E-43 |
| AATF | SPOP    | protein_coding | 0.601 | 4.63046E-43 |
| AATF | XPO5    | protein_coding | 0.671 | 7.94296E-57 |

|      |           |                |       |             |
|------|-----------|----------------|-------|-------------|
| AATF | PIGT      | protein_coding | 0.639 | 5.53172E-50 |
| AATF | COASY     | protein_coding | 0.684 | 8.34162E-60 |
| AATF | TRAF2     | protein_coding | 0.664 | 3.93953E-55 |
| AATF | DTNBP1    | protein_coding | 0.602 | 3.34717E-43 |
| AATF | CCT5      | protein_coding | 0.689 | 4.99425E-61 |
| AATF | MTX1      | protein_coding | 0.694 | 3.81506E-62 |
| AATF | TUBD1     | protein_coding | 0.628 | 7.93321E-48 |
| AATF | SFPQ      | protein_coding | 0.612 | 7.6978E-45  |
| AATF | PSMD11    | protein_coding | 0.762 | 1.28784E-81 |
| AATF | ALYREF    | protein_coding | 0.702 | 3.88525E-64 |
| AATF | DENR      | protein_coding | 0.603 | 2.03897E-43 |
| AATF | MSH2      | protein_coding | 0.633 | 8.05025E-49 |
| AATF | C14orf119 | protein_coding | 0.629 | 3.85153E-48 |
| AATF | AKIP1     | protein_coding | 0.671 | 1.07765E-56 |
| AATF | BAG6      | protein_coding | 0.663 | 4.67339E-55 |
| AATF | DGKZ      | protein_coding | 0.601 | 6.05484E-43 |
| AATF | PSMC5     | protein_coding | 0.671 | 1.0148E-56  |
| AATF | LRRC14    | protein_coding | 0.621 | 1.28938E-46 |
| AATF | PDRG1     | protein_coding | 0.693 | 5.7042E-62  |
| AATF | NUTF2     | protein_coding | 0.612 | 6.42556E-45 |
| AATF | TMEM101   | protein_coding | 0.755 | 1.93192E-79 |
| AATF | POLA2     | protein_coding | 0.608 | 2.90803E-44 |
| AATF | GIT1      | protein_coding | 0.683 | 1.73838E-59 |
| AATF | MAP1S     | protein_coding | 0.618 | 5.63773E-46 |
| AATF | RBM19     | protein_coding | 0.65  | 2.55782E-52 |
| AATF | ZNF526    | protein_coding | 0.658 | 5.95362E-54 |
| AATF | NOL10     | protein_coding | 0.685 | 5.24691E-60 |
| AATF | SNRPD3    | protein_coding | 0.606 | 7.53835E-44 |
| AATF | RNF220    | protein_coding | 0.694 | 4.03465E-62 |
| AATF | SAE1      | protein_coding | 0.683 | 1.83833E-59 |
| AATF | RASSF1    | protein_coding | 0.62  | 2.36376E-46 |
| AATF | EXOSC10   | protein_coding | 0.617 | 6.302E-46   |
| AATF | SHKBP1    | protein_coding | 0.641 | 1.72257E-50 |
| AATF | ZCCHC17   | protein_coding | 0.661 | 1.60824E-54 |
| AATF | E2F4      | protein_coding | 0.608 | 3.45021E-44 |
| AATF | TIMM50    | protein_coding | 0.619 | 2.99392E-46 |
| AATF | HNRNPA2B1 | protein_coding | 0.628 | 7.21609E-48 |
| AATF | MRPL53    | protein_coding | 0.664 | 2.92053E-55 |
| AATF | TMEM106C  | protein_coding | 0.632 | 1.11951E-48 |
| AATF | POC1A     | protein_coding | 0.615 | 2.12586E-45 |
| AATF | TPX2      | protein_coding | 0.622 | 7.87609E-47 |
| AATF | CCDC59    | protein_coding | 0.633 | 6.30455E-49 |
| AATF | QARS      | protein_coding | 0.645 | 3.86395E-51 |
| AATF | PYGO2     | protein_coding | 0.702 | 3.01942E-64 |

|      |          |                |       |             |
|------|----------|----------------|-------|-------------|
| AATF | FBL      | protein_coding | 0.631 | 1.502E-48   |
| AATF | MARS     | protein_coding | 0.614 | 2.66524E-45 |
| AATF | METTL5   | protein_coding | 0.676 | 5.66396E-58 |
| AATF | FAM104A  | protein_coding | 0.643 | 8.13756E-51 |
| AATF | WDR77    | protein_coding | 0.606 | 6.18803E-44 |
| AATF | ZBED8    | protein_coding | 0.602 | 3.49917E-43 |
| AATF | CSE1L    | protein_coding | 0.694 | 4.13338E-62 |
| AATF | HARS     | protein_coding | 0.603 | 2.52461E-43 |
| AATF | DAZAP1   | protein_coding | 0.711 | 1.37109E-66 |
| AATF | SSBP1    | protein_coding | 0.614 | 2.92254E-45 |
| AATF | SRRT     | protein_coding | 0.646 | 1.96591E-51 |
| AATF | TMEM14B  | protein_coding | 0.603 | 2.08722E-43 |
| AATF | SNRPB2   | protein_coding | 0.668 | 3.40506E-56 |
| AATF | HNRNPU   | protein_coding | 0.682 | 2.88461E-59 |
| AATF | NUP85    | protein_coding | 0.733 | 1.57706E-72 |
| AATF | DYNLL1   | protein_coding | 0.625 | 2.9456E-47  |
| AATF | SLC52A2  | protein_coding | 0.627 | 1.01485E-47 |
| AATF | CNIH4    | protein_coding | 0.617 | 7.81835E-46 |
| AATF | PKMYT1   | protein_coding | 0.677 | 4.56291E-58 |
| AATF | DHX30    | protein_coding | 0.652 | 1.19494E-52 |
| AATF | USP36    | protein_coding | 0.602 | 3.82576E-43 |
| AATF | RPL19    | protein_coding | 0.722 | 1.71979E-69 |
| AATF | GPN1     | protein_coding | 0.667 | 5.92239E-56 |
| AATF | CYTH2    | protein_coding | 0.601 | 5.75191E-43 |
| AATF | ANAPC7   | protein_coding | 0.699 | 1.92227E-63 |
| AATF | NFYC     | protein_coding | 0.603 | 2.49418E-43 |
| AATF | PSMD3    | protein_coding | 0.783 | 5.87447E-89 |
| AATF | CCNB1    | protein_coding | 0.685 | 5.08055E-60 |
| AATF | PRKRIP1  | protein_coding | 0.621 | 1.34091E-46 |
| AATF | MRM2     | protein_coding | 0.663 | 5.7184E-55  |
| AATF | RBMX     | protein_coding | 0.675 | 8.57421E-58 |
| AATF | NELFB    | protein_coding | 0.628 | 8.21553E-48 |
| AATF | SFSWAP   | protein_coding | 0.634 | 3.79589E-49 |
| AATF | KCMF1    | protein_coding | 0.615 | 1.98293E-45 |
| AATF | SMARCAL1 | protein_coding | 0.666 | 1.09277E-55 |
| AATF | SNRPA    | protein_coding | 0.694 | 3.05053E-62 |
| AATF | RRP9     | protein_coding | 0.745 | 2.30274E-76 |
| AATF | AP2B1    | protein_coding | 0.623 | 5.02699E-47 |
| AATF | CKLF     | protein_coding | 0.605 | 9.32471E-44 |
| AATF | JMJD4    | protein_coding | 0.602 | 3.26904E-43 |
| AATF | ORMDL2   | protein_coding | 0.605 | 1.24177E-43 |
| AATF | FAM50A   | protein_coding | 0.667 | 6.64105E-56 |
| AATF | DHX16    | protein_coding | 0.638 | 9.75211E-50 |
| AATF | RUFY1    | protein_coding | 0.643 | 8.29664E-51 |

|      |          |                |       |             |
|------|----------|----------------|-------|-------------|
| AATF | C20orf27 | protein_coding | 0.653 | 5.73057E-53 |
| AATF | XRCC6    | protein_coding | 0.714 | 3.01248E-67 |
| AATF | PSMG3    | protein_coding | 0.634 | 5.36388E-49 |
| AATF | MCRS1    | protein_coding | 0.724 | 5.73753E-70 |
| AATF | BUD23    | protein_coding | 0.657 | 1.21514E-53 |
| AATF | NUDT1    | protein_coding | 0.677 | 3.6219E-58  |
| AATF | GPANK1   | protein_coding | 0.637 | 1.38271E-49 |
| AATF | RPP30    | protein_coding | 0.627 | 9.79968E-48 |
| AATF | NUP93    | protein_coding | 0.632 | 1.28795E-48 |
| AATF | SLC25A39 | protein_coding | 0.68  | 6.77606E-59 |
| AATF | DNTTIP1  | protein_coding | 0.715 | 1.4901E-67  |
| AATF | C1orf35  | protein_coding | 0.71  | 3.44184E-66 |
| AATF | CCT4     | protein_coding | 0.708 | 8.6195E-66  |
| AATF | OXLD1    | protein_coding | 0.657 | 9.55531E-54 |
| AATF | AAR2     | protein_coding | 0.621 | 1.62135E-46 |
| AATF | HM13     | protein_coding | 0.607 | 4.25271E-44 |
| AATF | DVL2     | protein_coding | 0.617 | 7.29841E-46 |
| AATF | ATIC     | protein_coding | 0.705 | 5.72415E-65 |
| AATF | PTGES3   | protein_coding | 0.704 | 8.19555E-65 |
| AATF | GEMIN6   | protein_coding | 0.601 | 5.16342E-43 |
| AATF | TRAIIP   | protein_coding | 0.683 | 1.54429E-59 |
| AATF | KTI12    | protein_coding | 0.664 | 3.91085E-55 |
| AATF | PSMB4    | protein_coding | 0.682 | 2.30534E-59 |
| AATF | GOSR2    | protein_coding | 0.645 | 3.41437E-51 |
| AATF | NCBP2    | protein_coding | 0.605 | 9.56135E-44 |
| AATF | METTL13  | protein_coding | 0.624 | 4.37442E-47 |
| AATF | EIF1     | protein_coding | 0.669 | 2.66703E-56 |
| AATF | EZH1     | protein_coding | 0.601 | 5.96125E-43 |
| AATF | MIEN1    | protein_coding | 0.735 | 3.86036E-73 |
| AATF | ZNF282   | protein_coding | 0.624 | 4.49959E-47 |
| AATF | SNX17    | protein_coding | 0.652 | 1.28238E-52 |
| AATF | NELFCD   | protein_coding | 0.623 | 6.49756E-47 |
| AATF | ZNF581   | protein_coding | 0.615 | 1.6162E-45  |
| AATF | POLR3F   | protein_coding | 0.619 | 3.35864E-46 |
| AATF | PDCD5    | protein_coding | 0.634 | 4.44846E-49 |
| AATF | TRIM65   | protein_coding | 0.681 | 3.66875E-59 |
| AATF | GRB2     | protein_coding | 0.64  | 3.62231E-50 |
| AATF | PTPN23   | protein_coding | 0.621 | 1.47288E-46 |
| AATF | LSM8     | protein_coding | 0.614 | 3.08306E-45 |
| AATF | RDM1     | protein_coding | 0.601 | 5.89569E-43 |
| AATF | DCTN2    | protein_coding | 0.729 | 1.97124E-71 |
| AATF | LAMTOR1  | protein_coding | 0.607 | 5.55114E-44 |
| AATF | RIC8A    | protein_coding | 0.645 | 2.46578E-51 |
| AATF | ILKAP    | protein_coding | 0.657 | 7.94845E-54 |

|      |         |                |       |             |
|------|---------|----------------|-------|-------------|
| AATF | TADA2A  | protein_coding | 0.641 | 1.79694E-50 |
| AATF | STIP1   | protein_coding | 0.712 | 1.0901E-66  |
| AATF | SAP30BP | protein_coding | 0.765 | 9.01432E-83 |
| AATF | AMZ2    | protein_coding | 0.685 | 4.07243E-60 |
| AATF | MED25   | protein_coding | 0.617 | 7.22425E-46 |
| AATF | UBE2Z   | protein_coding | 0.719 | 1.26054E-68 |
| AATF | PIGC    | protein_coding | 0.66  | 1.98213E-54 |
| AATF | MELK    | protein_coding | 0.636 | 2.02628E-49 |
| AATF | GLRX3   | protein_coding | 0.609 | 1.88661E-44 |
| AATF | ADRM1   | protein_coding | 0.642 | 1.08829E-50 |
| AATF | XRCC1   | protein_coding | 0.648 | 7.56143E-52 |
| AATF | CENPH   | protein_coding | 0.672 | 6.4091E-57  |
| AATF | C8orf33 | protein_coding | 0.603 | 2.19074E-43 |
| AATF | ARFIP2  | protein_coding | 0.615 | 1.65414E-45 |
| AATF | PNO1    | protein_coding | 0.606 | 6.7535E-44  |
| AATF | PLK1    | protein_coding | 0.64  | 3.61299E-50 |
| AATF | CFAP36  | protein_coding | 0.604 | 1.50279E-43 |
| AATF | EFTUD2  | protein_coding | 0.827 | 1.8123E-107 |
| AATF | POLR2H  | protein_coding | 0.632 | 9.75306E-49 |
| AATF | ARL16   | protein_coding | 0.662 | 1.00754E-54 |
| AATF | TRMT1   | protein_coding | 0.684 | 8.09052E-60 |
| AATF | VPS16   | protein_coding | 0.657 | 1.21296E-53 |
| AATF | SYMPK   | protein_coding | 0.634 | 4.23607E-49 |
| AATF | IMPDH2  | protein_coding | 0.64  | 2.87857E-50 |
| AATF | SPATS2  | protein_coding | 0.66  | 2.04044E-54 |
| AATF | BCL2L12 | protein_coding | 0.61  | 1.226E-44   |

---
